# Supplementary material
Source: Research Square preprint supplement (doi:10.21203/rs.3.rs-9145854/v1)
Supplement: Supplementary file 1 [file a43d3ebf689b57b5ee4b1e2e.pdf]

## Supporting Information

# Scalable synthesis of hetero-structured Ni/NiO@RE<sub>2</sub>O<sub>3</sub>/C for high-performance industrial-scale HER catalysis by AEMWE

Xin Wei,<sup>1</sup> Jiejie Meng,<sup>1</sup> Xing Hu,<sup>2</sup> Xueming Su,<sup>3</sup> Hongbo Geng,<sup>3\*</sup> Kezhu Jiang,<sup>2</sup> Duo Wang,<sup>1</sup>

Xiaoqing Huang,<sup>4\*</sup> Lingzheng Bu<sup>1\*</sup>

<sup>1</sup>College of Energy, Xiamen University, Xiamen, 361102, P. R. China

<sup>2</sup>Tianjin Key Laboratory of Materials Laminating Fabrication and Interface Control Technology, School of Materials Science and Engineering, Hebei University of Technology, Tianjin, 300401, P. R. China

<sup>3</sup>School of Materials Engineering, Suzhou University of Technology, Changshu, 215500, P. R. China

<sup>4</sup>State Key Laboratory of Physical Chemistry of Solid Surfaces, College of Chemistry and Chemical Engineering, Xiamen University, Xiamen, 361005, P. R. China

\*To whom correspondence should be addressed.

E-mail: hbgeng@szut.edu.cn; hxq006@xmu.edu.cn; lzbu@xmu.edu.cn

## Supplementary Figures and Tables:

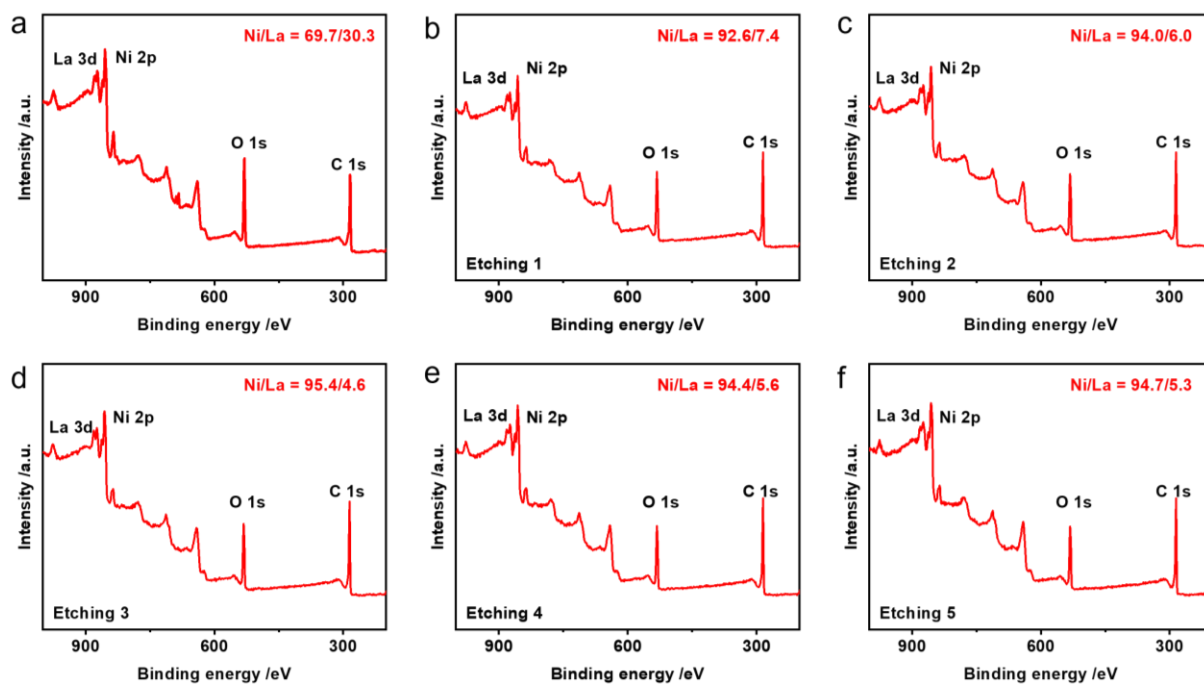

**Supplementary Figure 1.** XPS survey spectra of Ni/NiO@La<sub>2</sub>O<sub>3</sub>/C (a) before and (b-f) after the (b) 1<sup>st</sup>, (c) 2<sup>nd</sup>, (d) 3<sup>rd</sup>, (e) 4<sup>th</sup> and (f) 5<sup>th</sup> etching. The initial Ni/NiO@La<sub>2</sub>O<sub>3</sub>/C without etching was defined as the sample of (a) S<sub>0</sub>. The Ni/NiO@La<sub>2</sub>O<sub>3</sub>/C after different etching degrees were defined as samples of (b) S<sub>1</sub>, (c) S<sub>2</sub>, (d) S<sub>3</sub>, (e) S<sub>4</sub> and (f) S<sub>5</sub>.

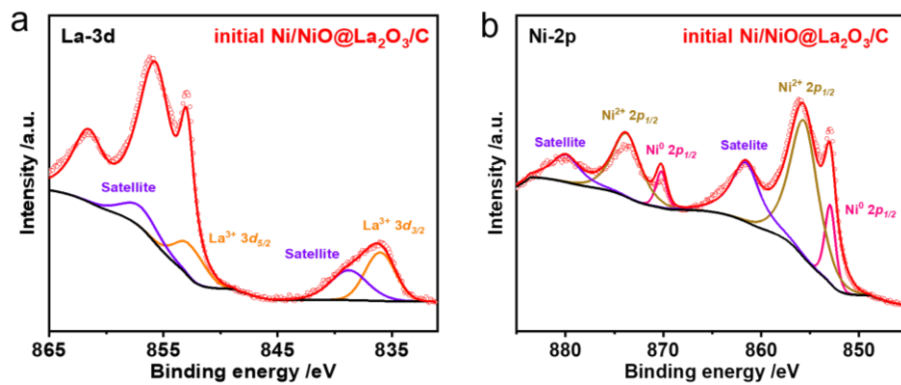

Supplementary Figure 2. XPS spectra of (a) La 3d and (b) Ni 2p for initial Ni/NiO@La<sub>2</sub>O<sub>3</sub>/C (S<sub>0</sub>).

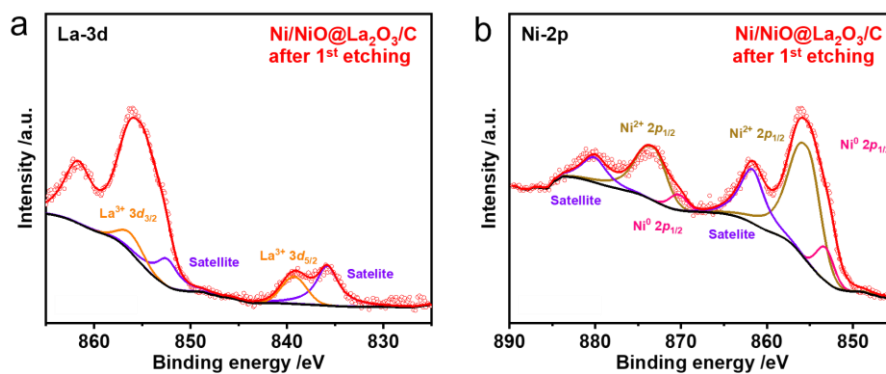

**Supplementary Figure 3.** XPS spectra of (a) La 3d and (b) Ni 2p for Ni/NiO@La<sub>2</sub>O<sub>3</sub>/C after the 1<sup>st</sup> etching (S<sub>1</sub>).

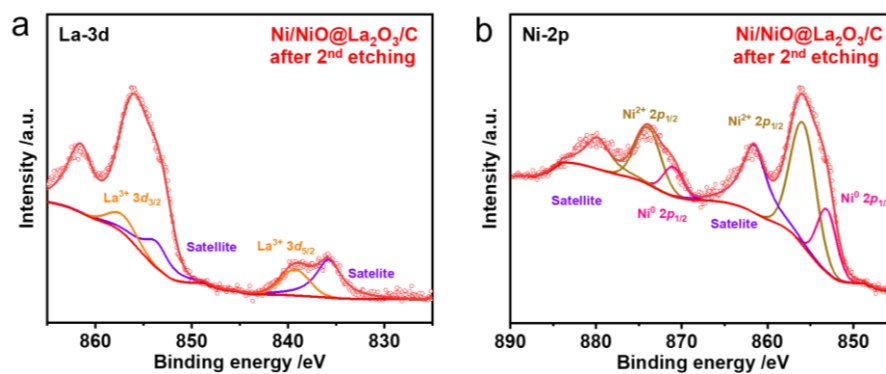

**Supplementary Figure 4.** XPS spectra of (a) La 3d and (b) Ni 2p for Ni/NiO@La<sub>2</sub>O<sub>3</sub>/C after the 2<sup>nd</sup> etching (S<sub>2</sub>).

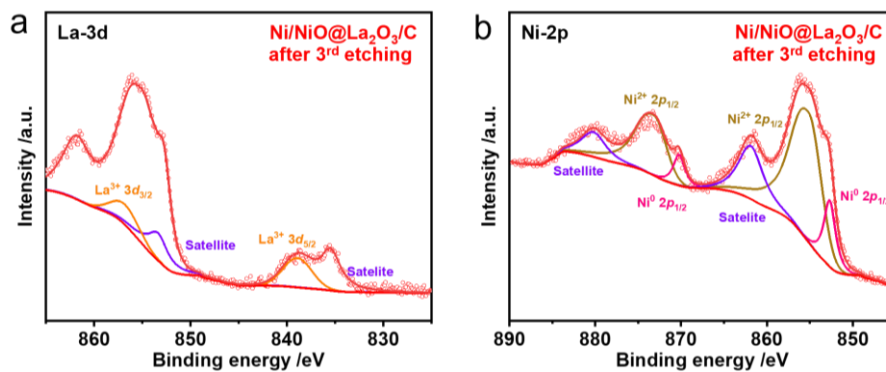

**Supplementary Figure 5.** XPS spectra of (a) La 3d and (b) Ni 2p for Ni/NiO@La<sub>2</sub>O<sub>3</sub>/C after the 3<sup>rd</sup> etching (S<sub>3</sub>).

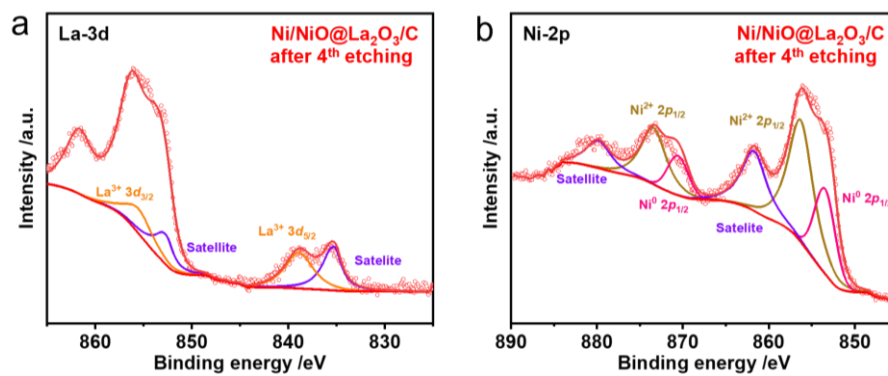

**Supplementary Figure 6.** XPS spectra of (a) La 3d and (b) Ni 2p for Ni/NiO@La<sub>2</sub>O<sub>3</sub>/C after the 4<sup>th</sup> etching (S4).

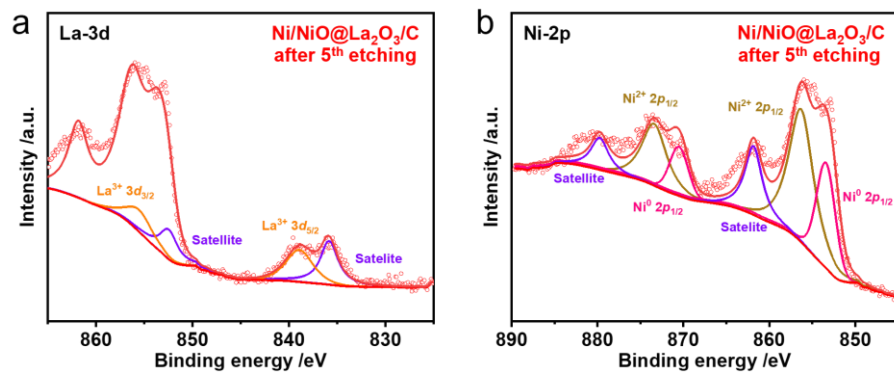

**Supplementary Figure 7.** XPS spectra of (a) La 3d and (b) Ni 2p for Ni/NiO@La<sub>2</sub>O<sub>3</sub>/C after the 5<sup>th</sup> etching (S<sub>5</sub>).

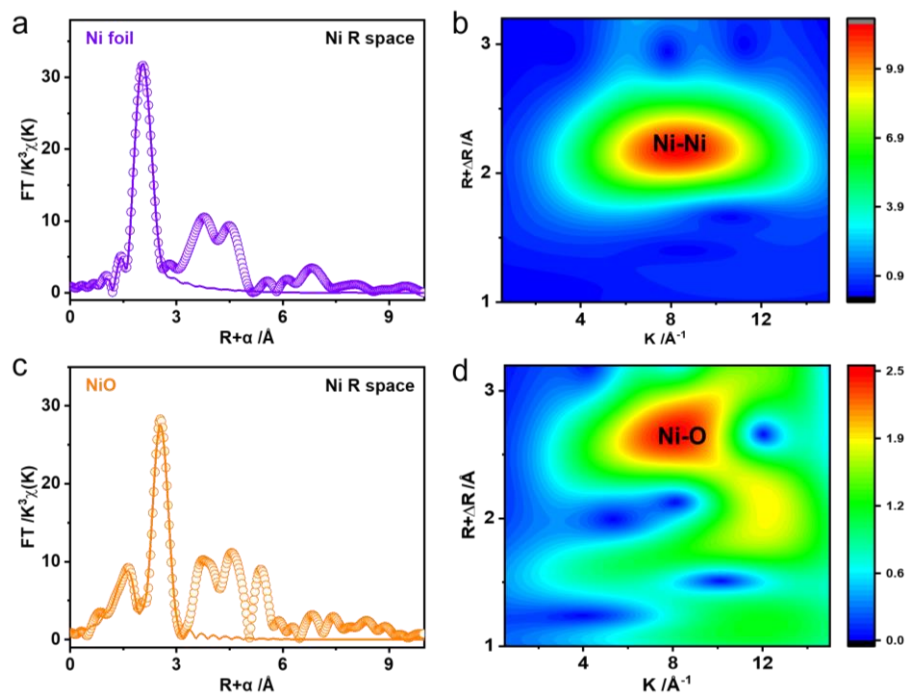

**Supplementary Figure 8.** (a, c) Ni K-edge EXAFS analyses in R and k spaces for (a) Ni foil and (c) NiO. (b, d) WT analyses of Ni K-edge FT-EXAFS data for (b) Ni foil and (d) NiO.

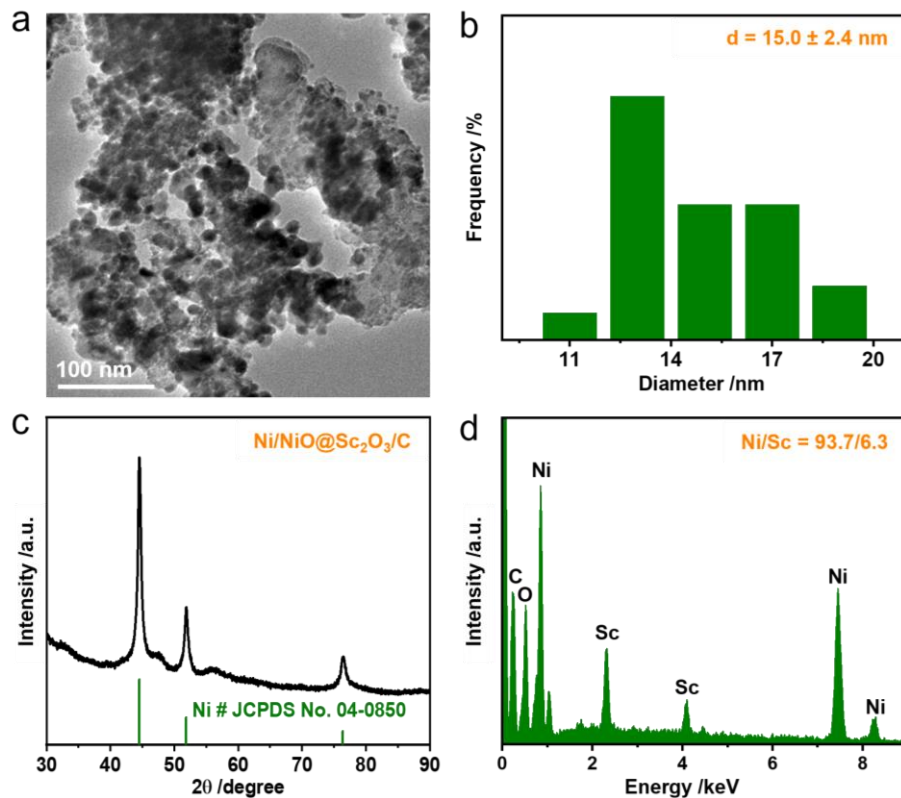

**Supplementary Figure 9.** (a) TEM image, (b) diameter distribution, (c) XRD pattern and (d) SEM-EDS of Ni/NiO@Sc<sub>2</sub>O<sub>3</sub>/C.

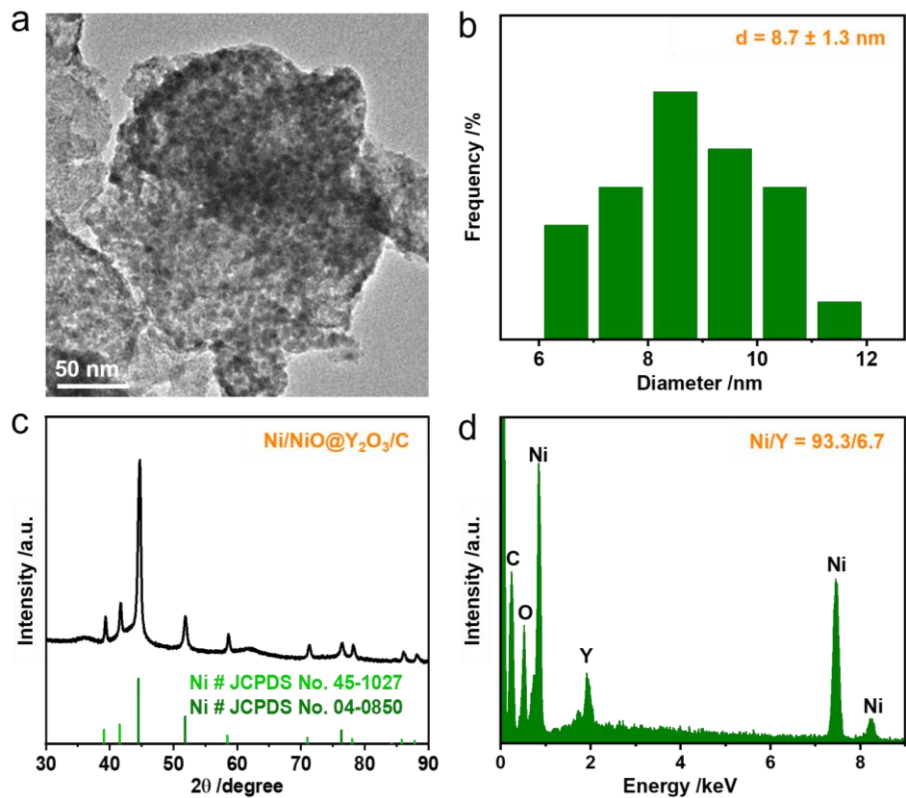

**Supplementary Figure 10.** (a) TEM image, (b) diameter distribution, (c) XRD pattern and (d) SEM-EDS of Ni/NiO@Y<sub>2</sub>O<sub>3</sub>/C.

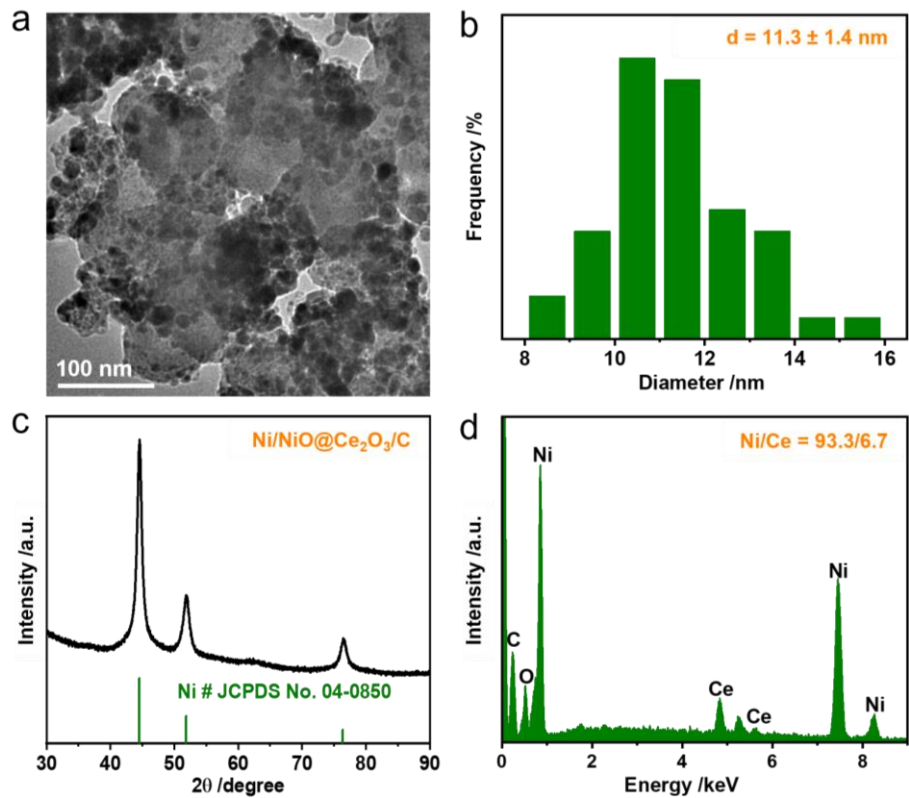

**Supplementary Figure 11.** (a) TEM image, (b) diameter distribution, (c) XRD pattern and (d) SEM-EDS of Ni/NiO@Ce<sub>2</sub>O<sub>3</sub>/C.

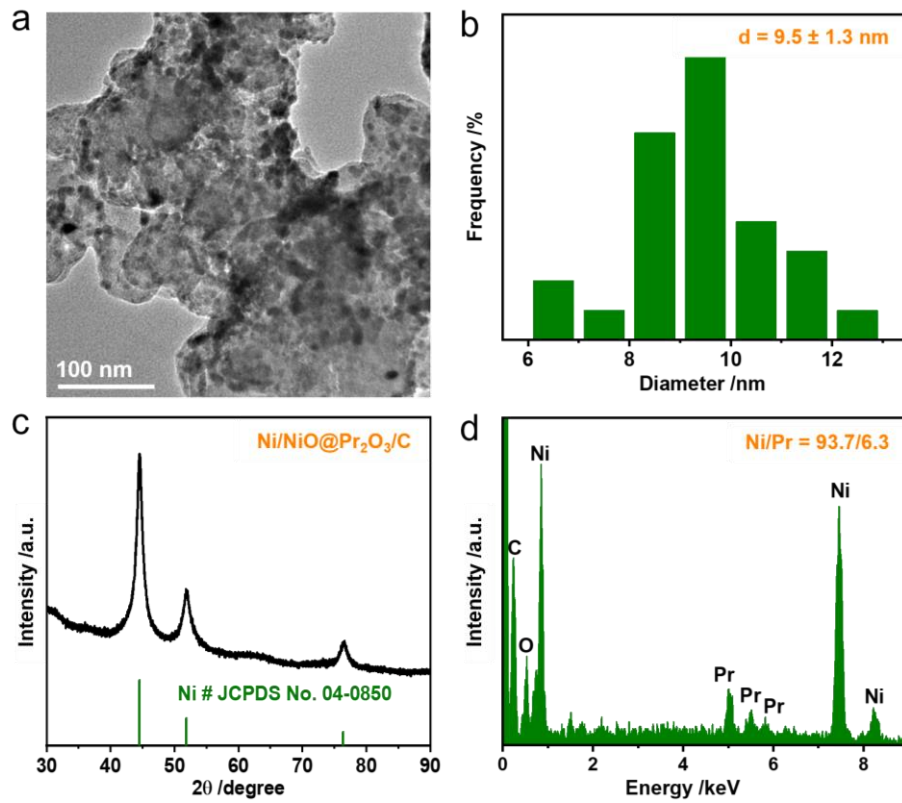

**Supplementary Figure 12.** (a) TEM image, (b) diameter distribution, (c) XRD pattern and (d) SEM-EDS of Ni/NiO@Pr<sub>2</sub>O<sub>3</sub>/C.

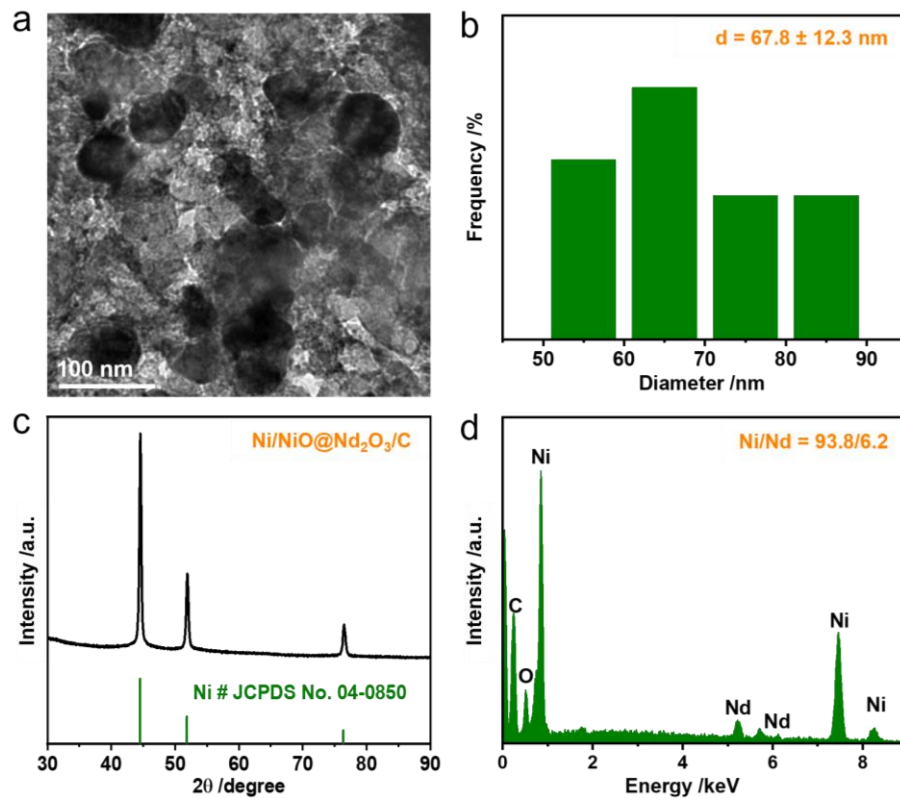

**Supplementary Figure 13.** (a) TEM image, (b) diameter distribution, (c) XRD pattern and (d) SEM-EDS of Ni/NiO@Nd<sub>2</sub>O<sub>3</sub>/C.

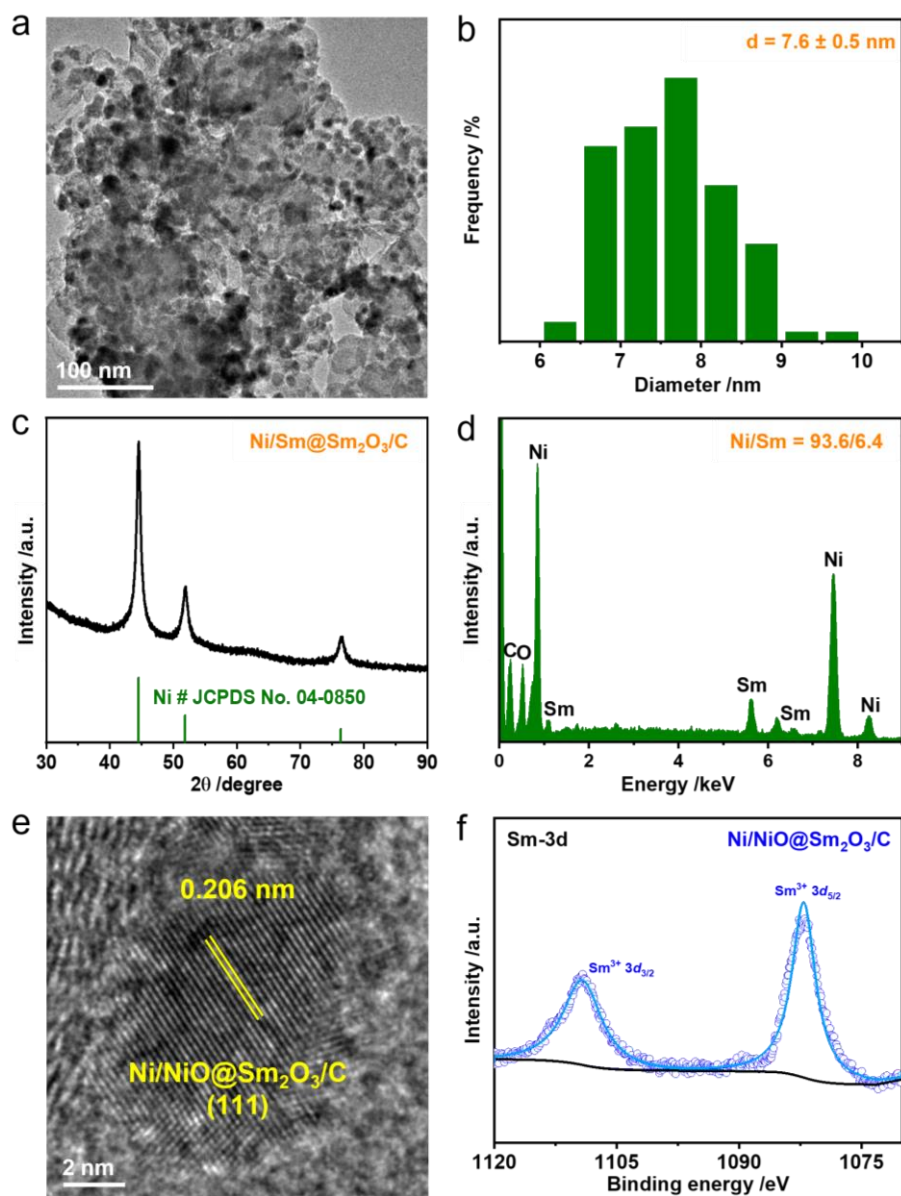

**Supplementary Figure 14.** (a) TEM image, (b) diameter distribution, (c) XRD pattern and (d) SEM-EDS, (e) HRTEM image and (f) 3d XPS spectrum of Sm of Ni/NiO@Sm<sub>2</sub>O<sub>3</sub>/C.

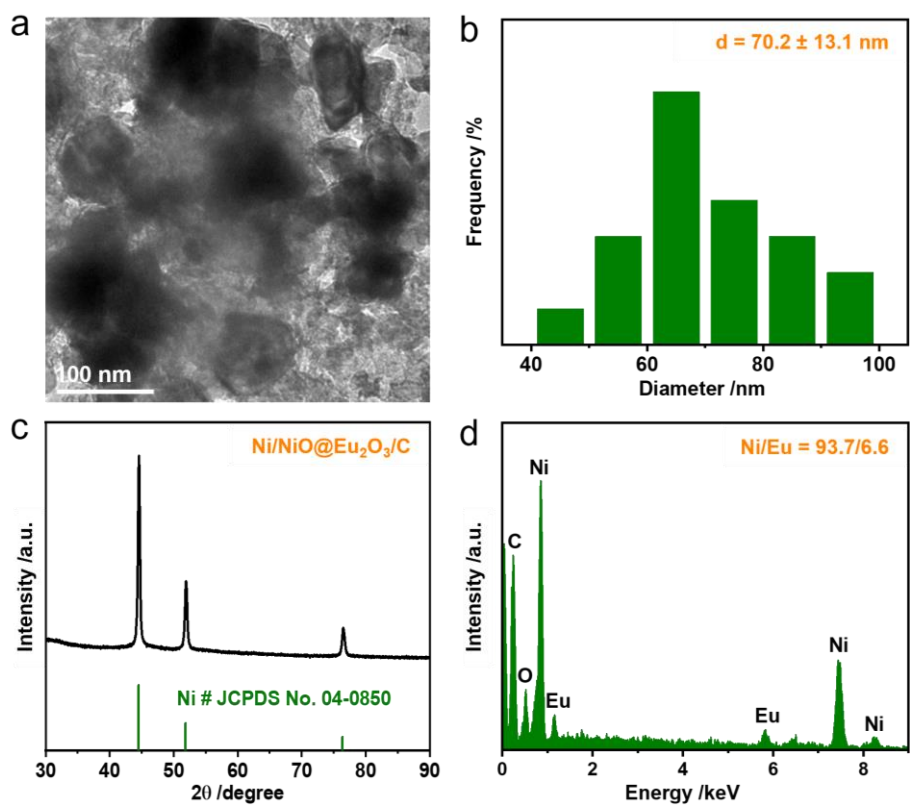

**Supplementary Figure 15.** (a) TEM image, (b) diameter distribution, (c) XRD pattern and (d) SEM-EDS of Ni/NiO@Eu<sub>2</sub>O<sub>3</sub>/C.

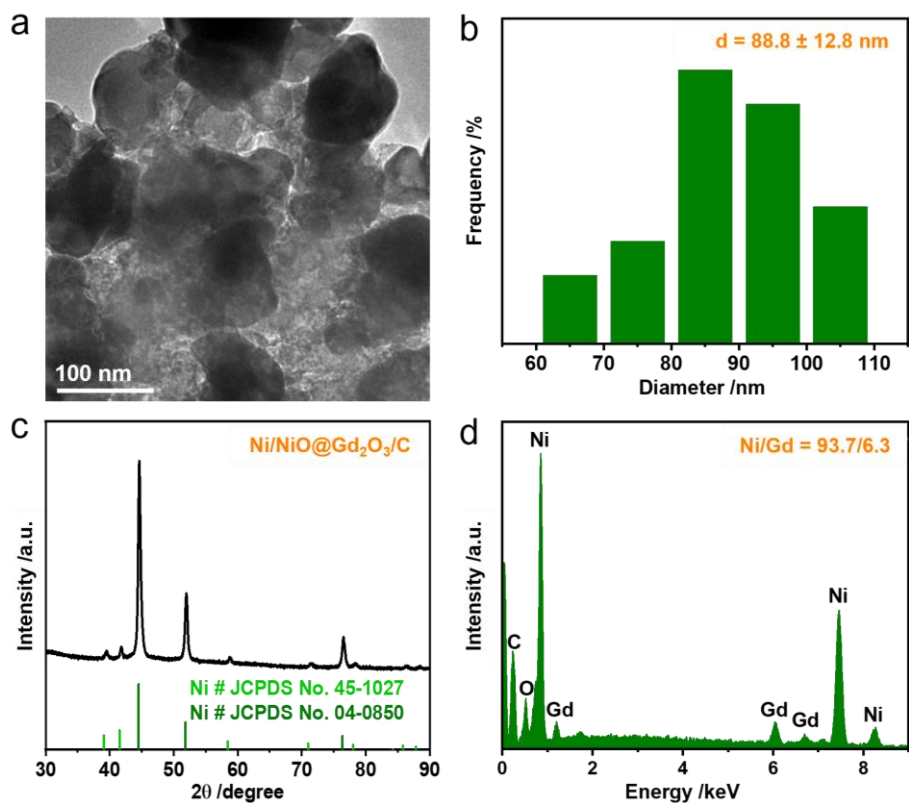

**Supplementary Figure 16.** (a) TEM image, (b) diameter distribution, (c) XRD pattern and (d) SEM-EDS of Ni/NiO@Gd<sub>2</sub>O<sub>3</sub>/C.

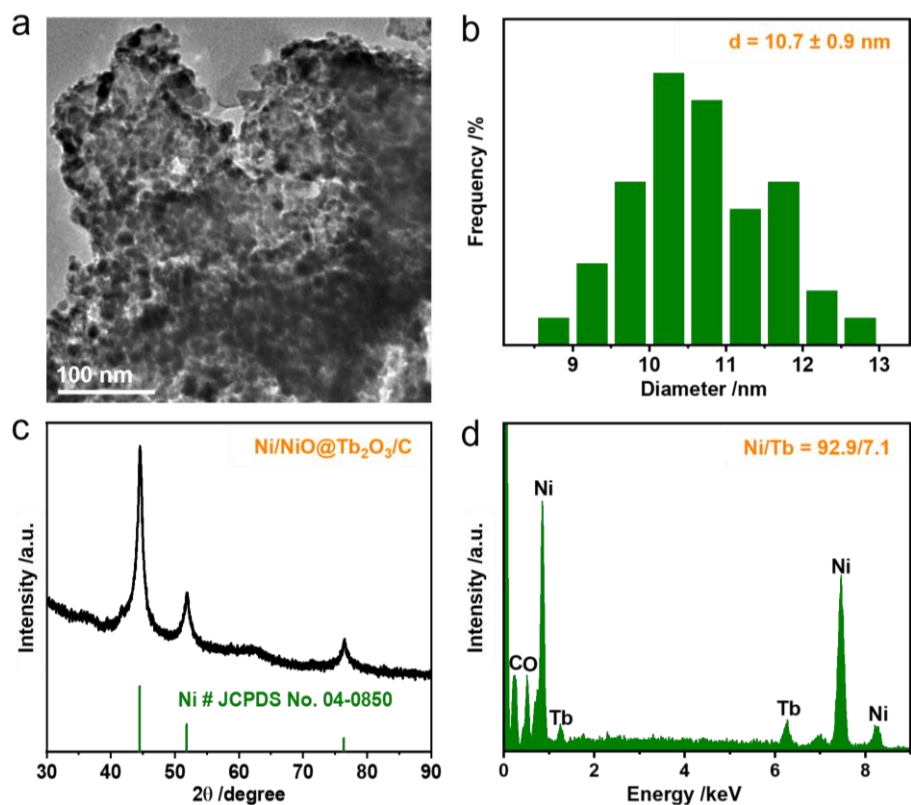

**Supplementary Figure 17.** (a) TEM image, (b) diameter distribution, (c) XRD pattern and (d) SEM-EDS of Ni/NiO@Tb<sub>2</sub>O<sub>3</sub>/C.

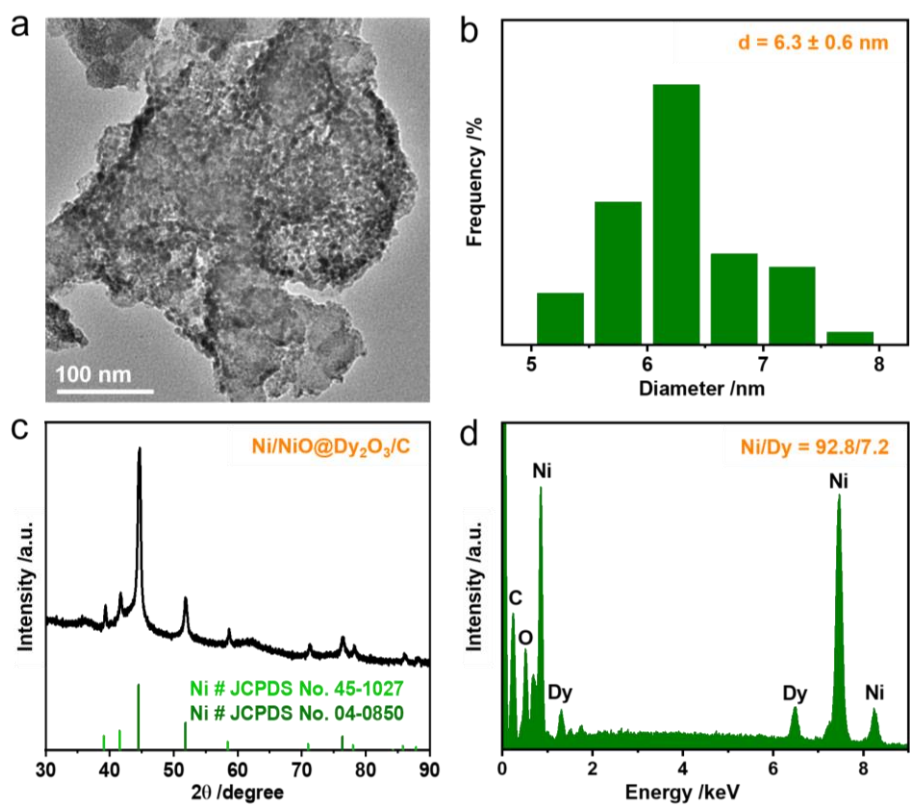

**Supplementary Figure 18.** (a) TEM image, (b) diameter distribution, (c) XRD pattern and (d) SEM-EDS of Ni/NiO@Dy<sub>2</sub>O<sub>3</sub>/C.

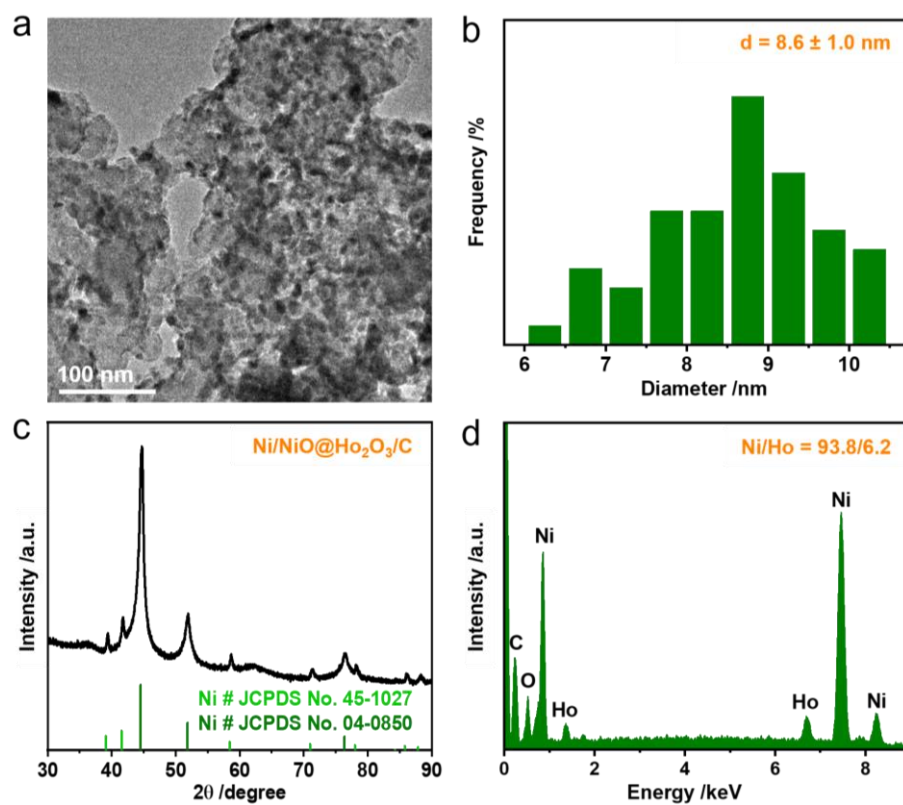

**Supplementary Figure 19.** (a) TEM image, (b) diameter distribution, (c) XRD pattern and (d) SEM-EDS of Ni/NiO@Ho<sub>2</sub>O<sub>3</sub>/C.

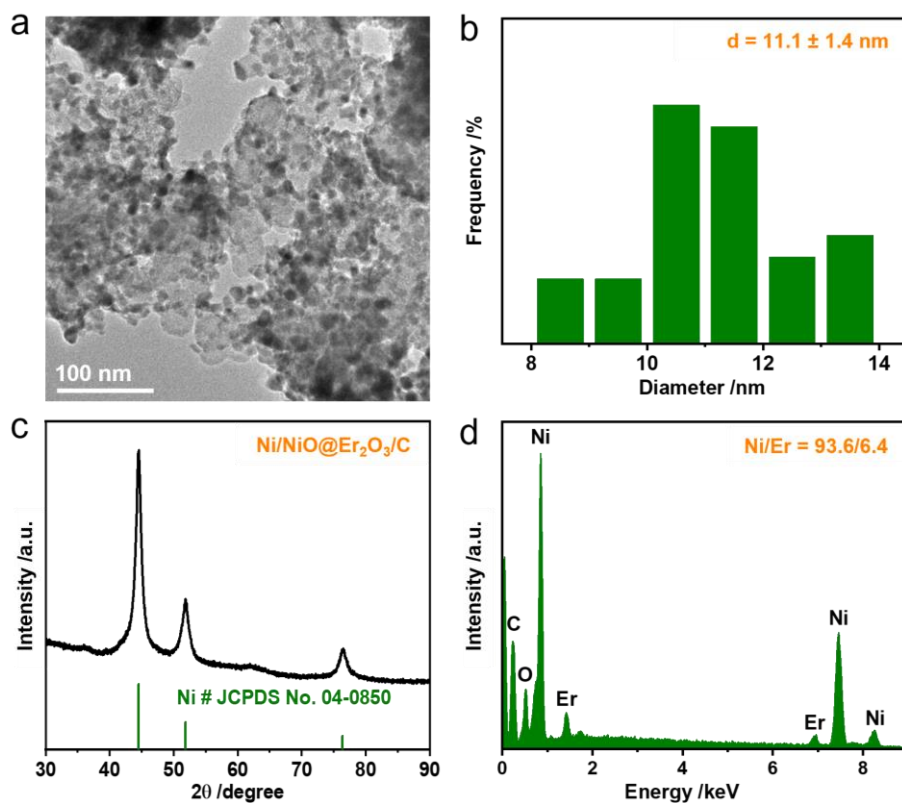

**Supplementary Figure 20.** (a) TEM image, (b) diameter distribution, (c) XRD pattern and (d) SEM-EDS of Ni/NiO@Er<sub>2</sub>O<sub>3</sub>/C.

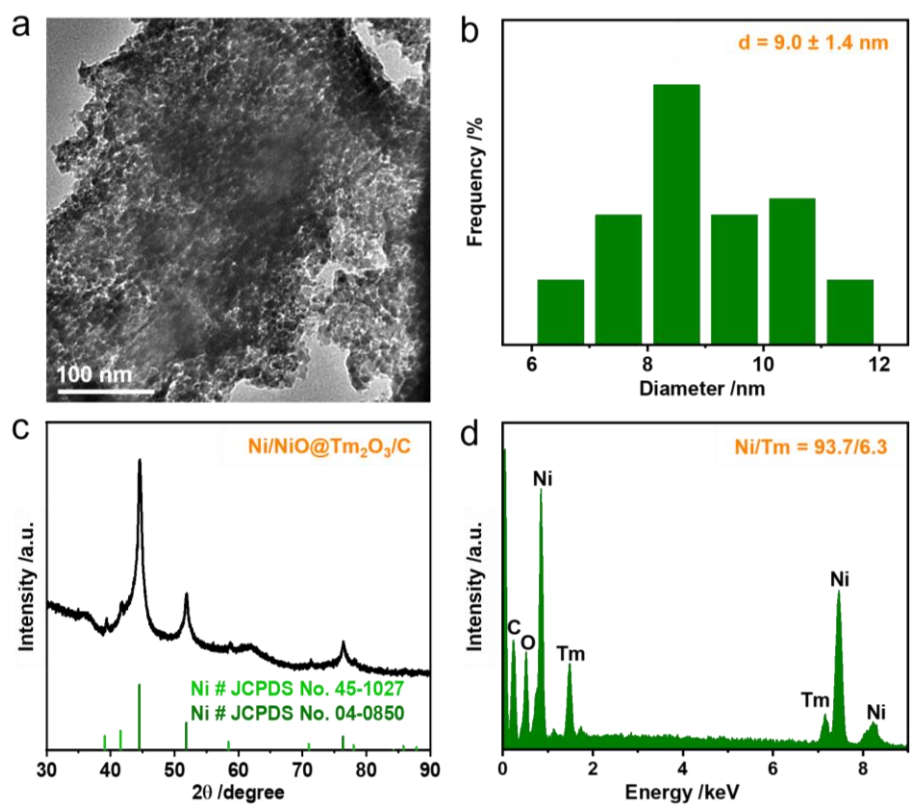

**Supplementary Figure 21.** (a) TEM image, (b) diameter distribution, (c) XRD pattern and (d) SEM-EDS of Ni/NiO@Tm<sub>2</sub>O<sub>3</sub>/C.

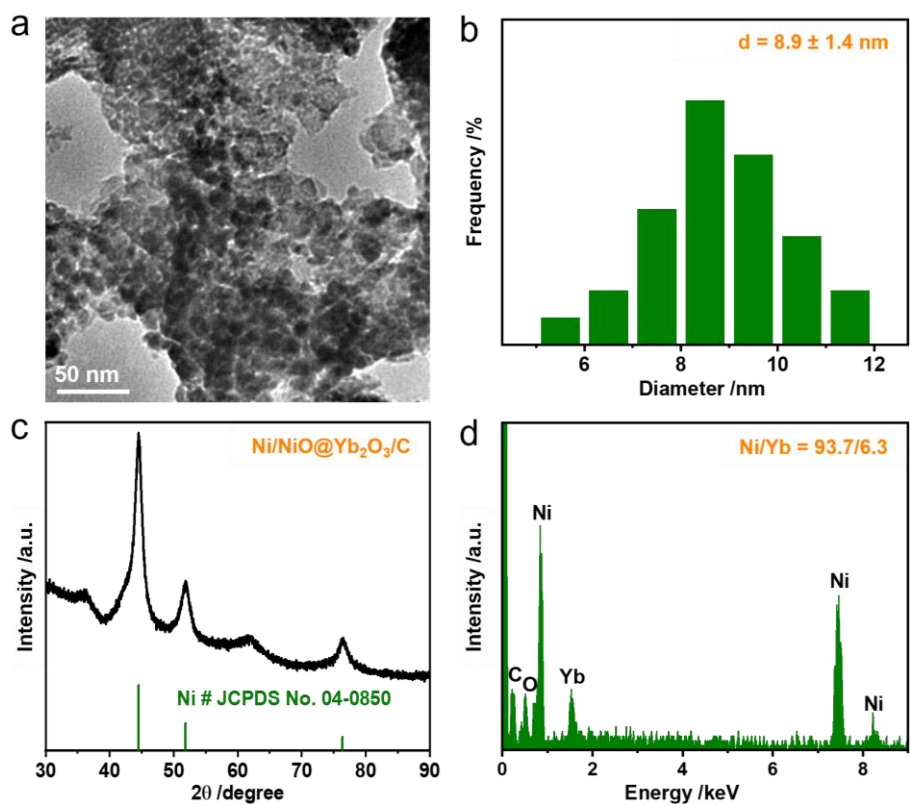

**Supplementary Figure 22.** (a) TEM image, (b) diameter distribution, (c) XRD pattern and (d) SEM-EDS of Ni/NiO@Yb<sub>2</sub>O<sub>3</sub>/C.

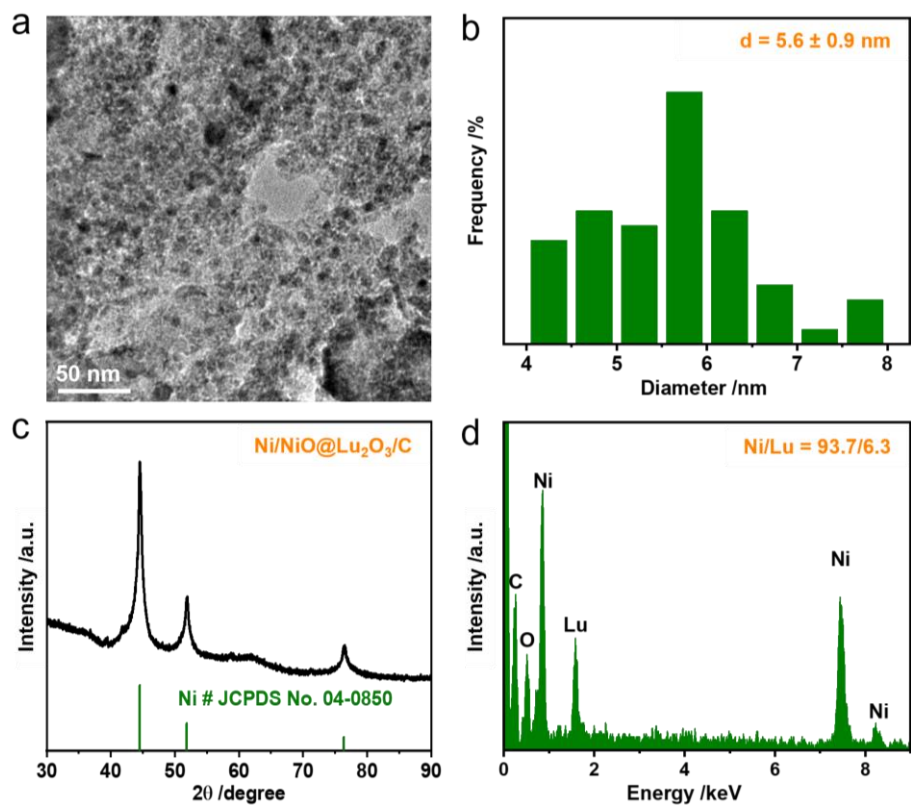

**Supplementary Figure 23.** (a) TEM image, (b) diameter distribution, (c) XRD pattern and (d) SEM-EDS of Ni/NiO@Lu<sub>2</sub>O<sub>3</sub>/C.

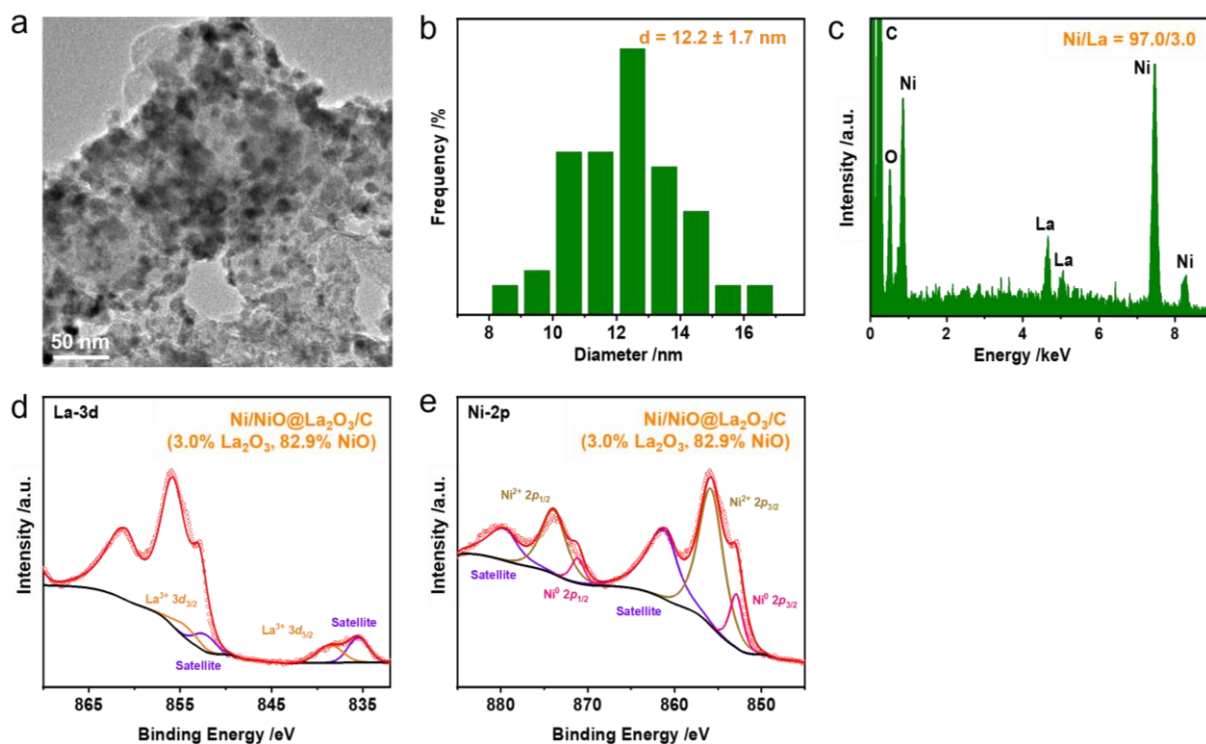

**Supplementary Figure 24.** (a) TEM image, (b) diameter distribution, (c) SEM-EDS, (d) La 3d XPS spectrum and (f) Ni 2p XPS spectrum of Ni/NiO@La<sub>2</sub>O<sub>3</sub>/C (3.0% La<sub>2</sub>O<sub>3</sub>, 82.9% NiO).

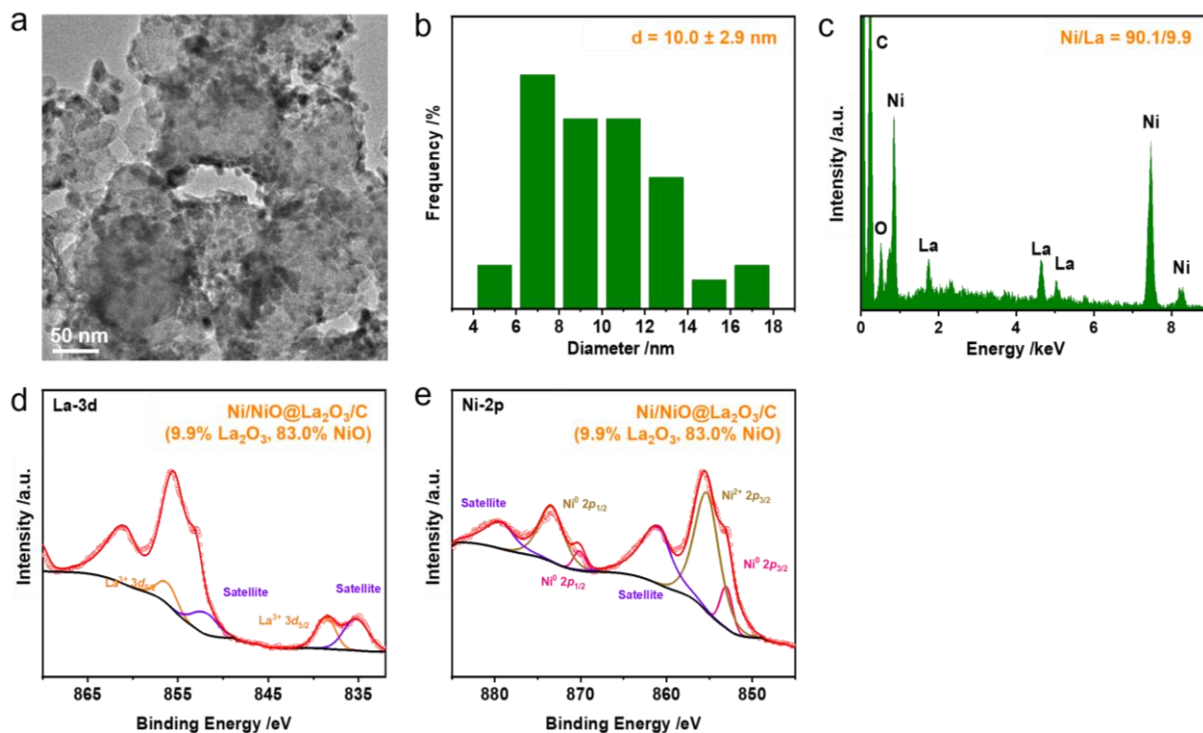

**Supplementary Figure 25.** (a) TEM image, (b) diameter distribution, (c) SEM-EDS, (d) La 3d XPS spectrum and (e) Ni 2p XPS spectrum of Ni/NiO@La<sub>2</sub>O<sub>3</sub>/C (9.9% La<sub>2</sub>O<sub>3</sub>, 83.0% NiO).

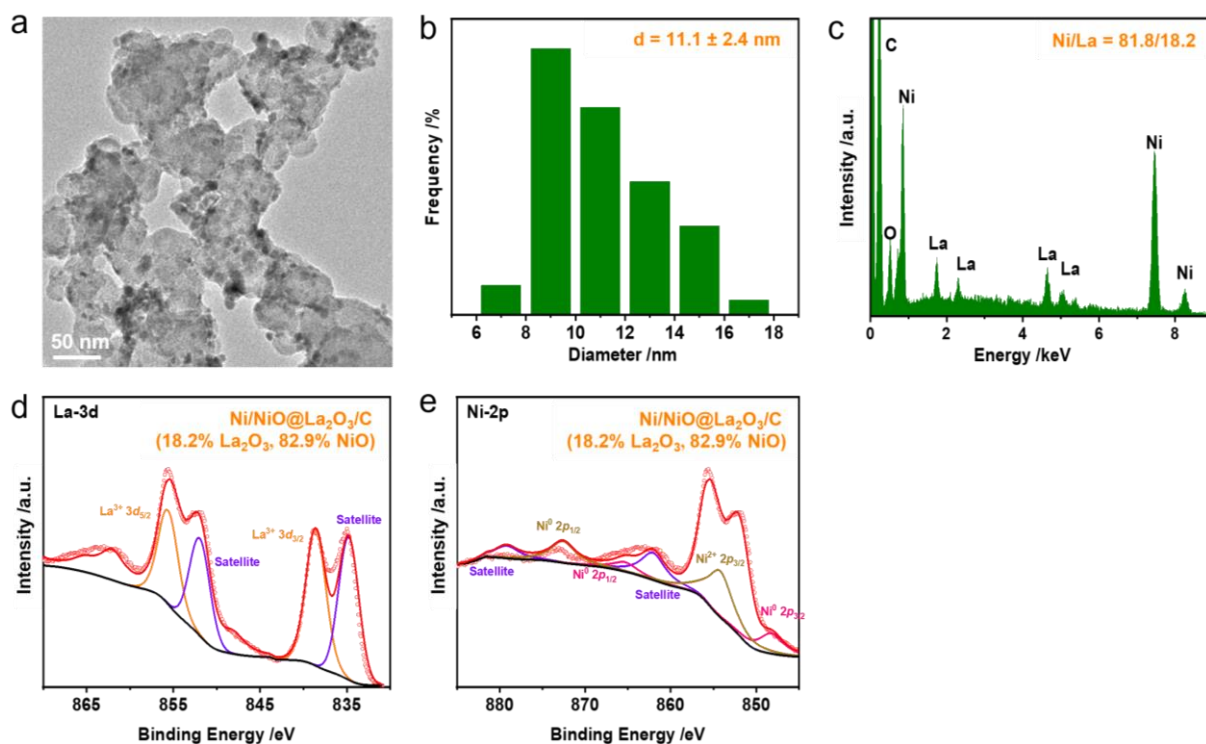

**Supplementary Figure 26.** (a) TEM image, (b) diameter distribution, (c) SEM-EDS, (d) La 3d XPS spectrum and (e) Ni 2p XPS spectrum of Ni/NiO@La<sub>2</sub>O<sub>3</sub>/C (18.2% La<sub>2</sub>O<sub>3</sub>, 82.9% NiO).

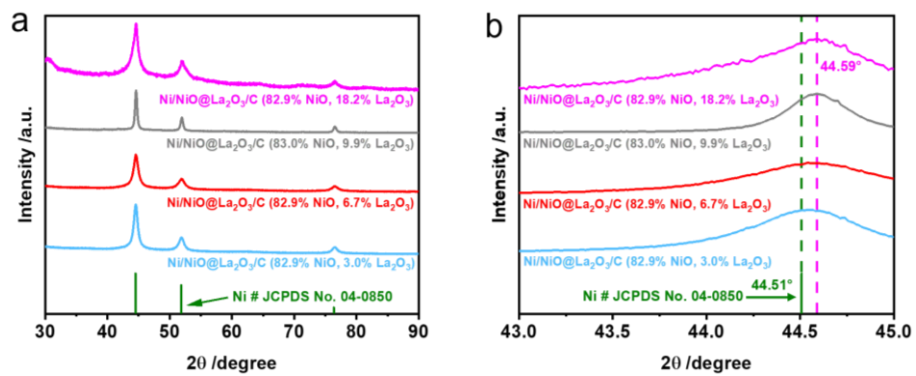

**Supplementary Figure 27.** (a) XRD patterns and (b) enlarged XRD patterns of Ni/NiO@La<sub>2</sub>O<sub>3</sub>/C (82.9% NiO) with different amounts of La<sub>2</sub>O<sub>3</sub> (3.0%, 6.7%, 9.9% and 18.2%).

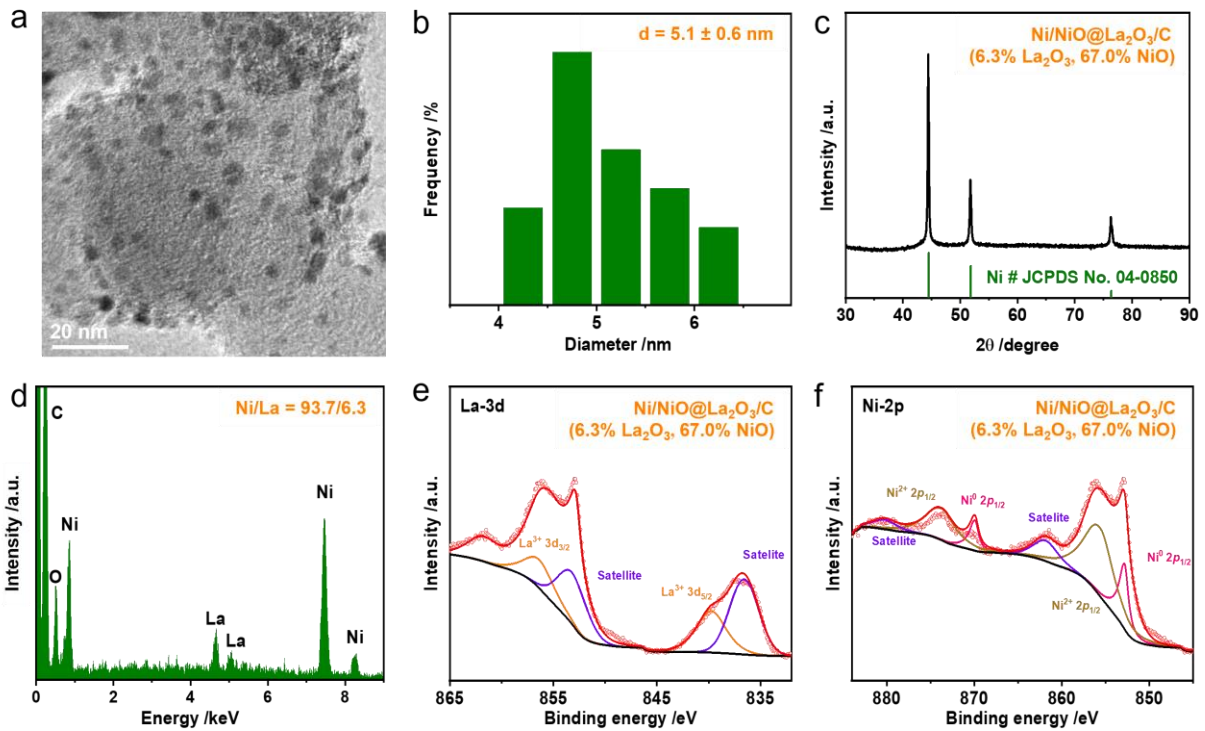

**Supplementary Figure 28.** (a) TEM image, (b) diameter distribution, (c) XRD pattern, (d) SEM-EDS, (e) La 3d XPS spectrum and (f) Ni 2p XPS spectrum of Ni/NiO@La<sub>2</sub>O<sub>3</sub>/C (6.3% La<sub>2</sub>O<sub>3</sub>, 67.0% NiO).

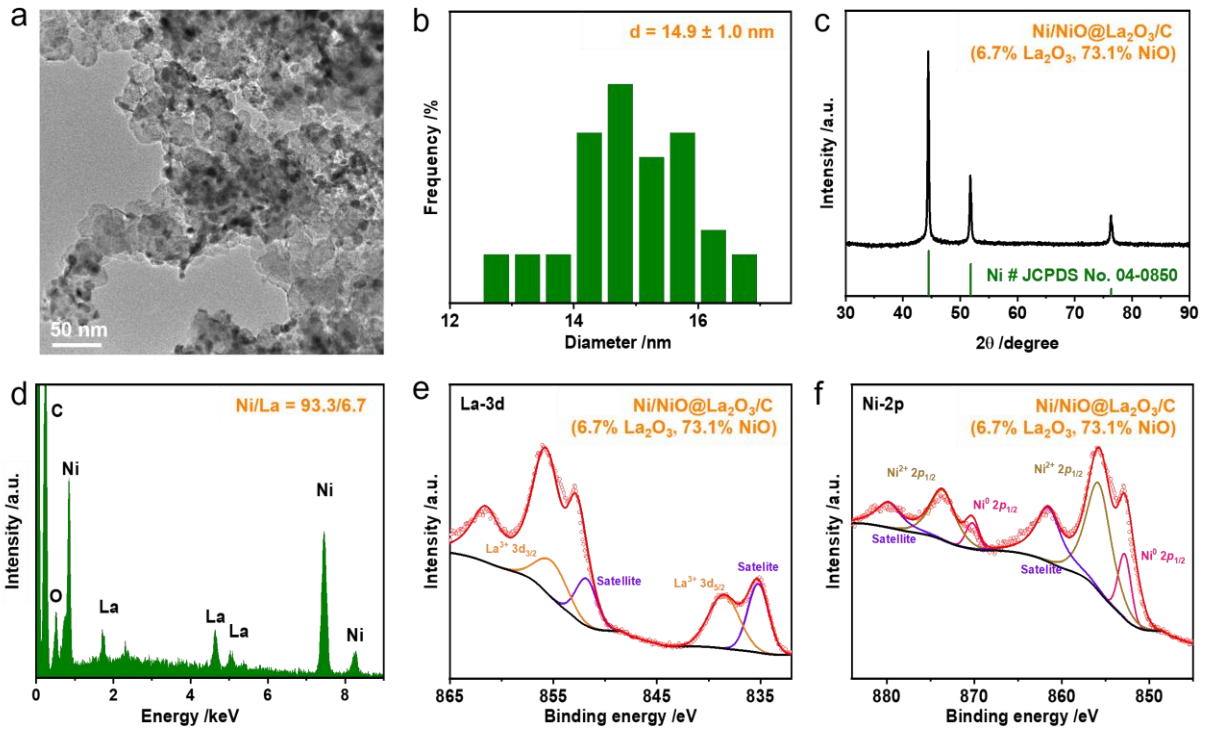

**Supplementary Figure 29.** (a) TEM image, (b) diameter distribution, (c) XRD pattern, (d) SEM-EDS, (e) La 3d XPS spectrum and (f) Ni 2p XPS spectrum of Ni/NiO@La<sub>2</sub>O<sub>3</sub>/C (6.7% La<sub>2</sub>O<sub>3</sub>, 73.1% NiO).

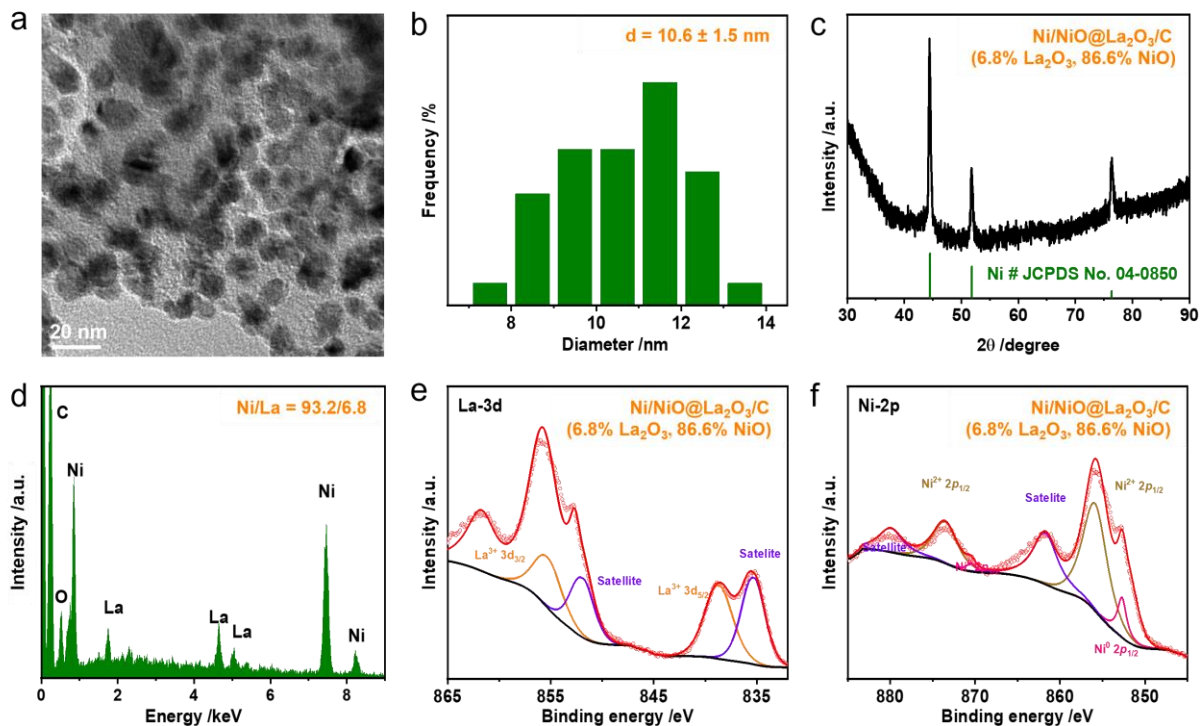

**Supplementary Figure 30.** (a) TEM image, (b) diameter distribution, (c) XRD pattern, (d) SEM-EDS, (e) La 3d XPS spectrum and (f) Ni 2p XPS spectrum of Ni/NiO@La<sub>2</sub>O<sub>3</sub>/C (6.8% La<sub>2</sub>O<sub>3</sub>, 86.6% NiO).

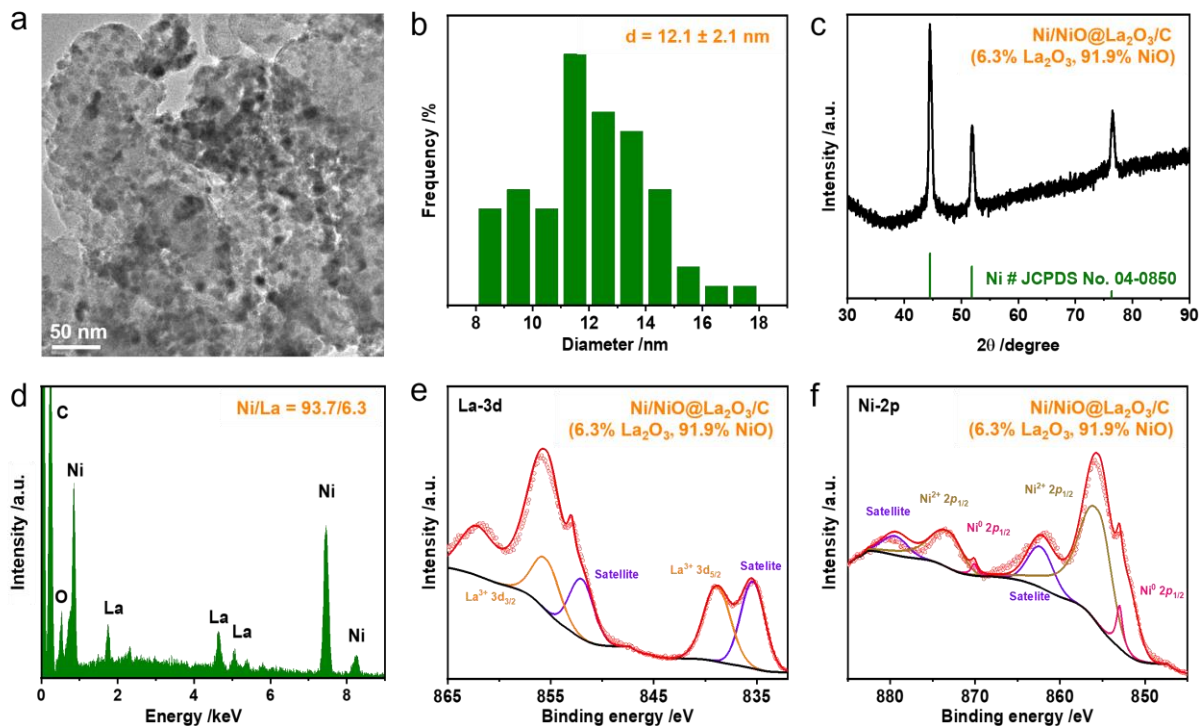

**Supplementary Figure 31.** (a) TEM image, (b) diameter distribution, (c) XRD pattern, (d) SEM-EDS, (e) La 3d XPS spectrum and (f) Ni 2p XPS spectrum of Ni/NiO@La<sub>2</sub>O<sub>3</sub>/C (6.3% La<sub>2</sub>O<sub>3</sub>, 91.9% NiO).

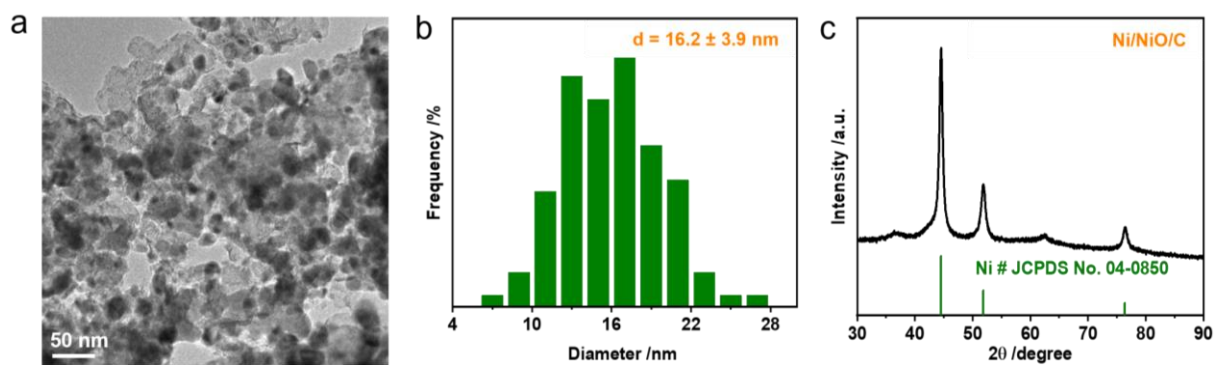

**Supplementary Figure 32.** (a) TEM image, (b) diameter distribution and (c) XRD pattern of Ni/NiO/C.

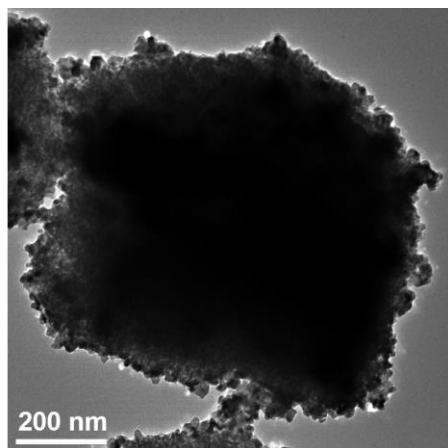

**Supplementary Figure 33.** TEM image of Raney Ni.

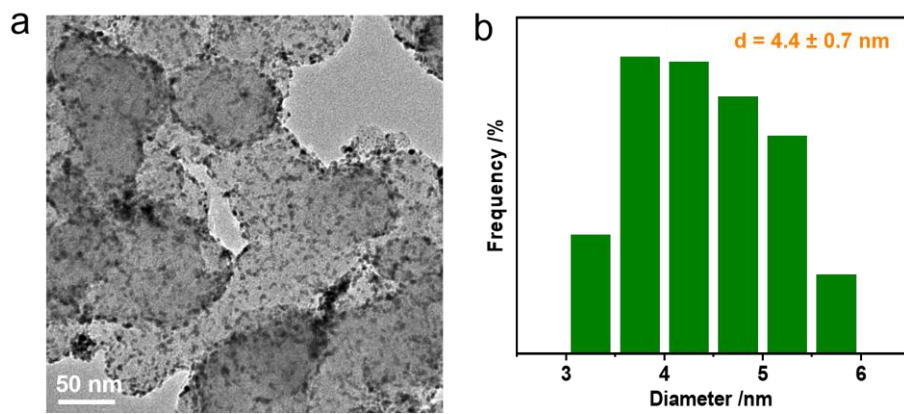

**Supplementary Figure 34.** (a) TEM image and (b) diameter distribution of commercial Pt/C.

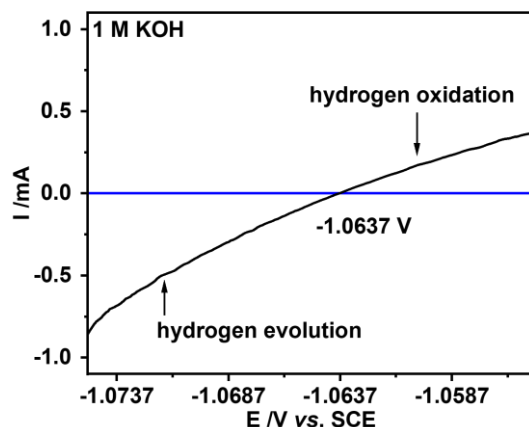

**Supplementary Figure 35.** Calibration of SCE and conversion to RHE. The calibration of saturated calomel electrode (SCE) reference electrode was performed in a standard three-electrode system with polished platinum electrodes as the working and counter electrodes, and the SCE as the reference electrode. Electrolyte was pre-purged and saturated with high purity  $\text{H}_2$ . Linear scanning voltammetry (LSV) was then run at a scan rate of  $0.1 \text{ mV s}^{-1}$ , and the potential at which the current crossed zero was taken to be the thermodynamic potential (vs. SCE) for the hydrogen electrode reaction. In 1 M KOH solution, the zero current point was at  $-1.0637 \text{ V}$ , so  $E(\text{RHE}) = E(\text{SCE}) + 1.0637 \text{ V}$ .

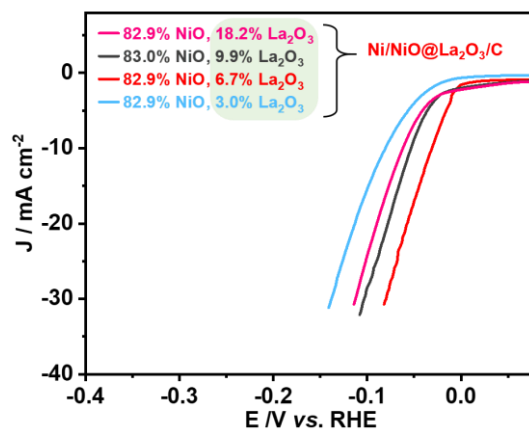

**Supplementary Figure 36.** LSV curves of Ni/NiO@La<sub>2</sub>O<sub>3</sub>/C (82.9% NiO, 18.2% La<sub>2</sub>O<sub>3</sub>), Ni/NiO@La<sub>2</sub>O<sub>3</sub>/C (83.0% NiO, 9.9% La<sub>2</sub>O<sub>3</sub>), Ni/NiO@La<sub>2</sub>O<sub>3</sub>/C (82.9% NiO, 6.7% La<sub>2</sub>O<sub>3</sub>) and Ni/NiO@La<sub>2</sub>O<sub>3</sub>/C (82.9% NiO, 3.0% La<sub>2</sub>O<sub>3</sub>) measured in 1 M KOH. The different contents of La<sub>2</sub>O<sub>3</sub> are based on the SEM-EDS measurements.

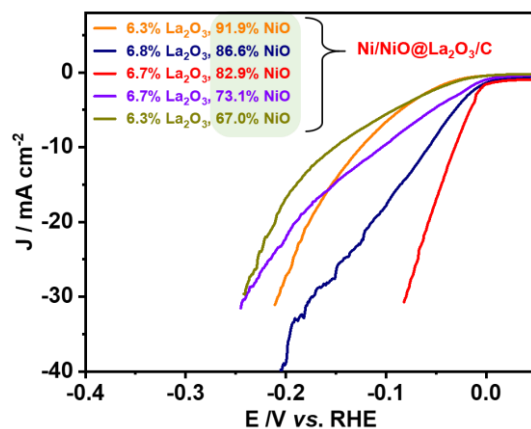

**Supplementary Figure 37.** LSV curves of Ni/NiO@La<sub>2</sub>O<sub>3</sub>/C (6.3% La<sub>2</sub>O<sub>3</sub>, 91.9% NiO), Ni/NiO@La<sub>2</sub>O<sub>3</sub>/C (6.8% La<sub>2</sub>O<sub>3</sub>, 86.6% NiO), Ni/NiO@La<sub>2</sub>O<sub>3</sub>/C (6.7% La<sub>2</sub>O<sub>3</sub>, 82.9% NiO), Ni/NiO@La<sub>2</sub>O<sub>3</sub>/C (6.7% La<sub>2</sub>O<sub>3</sub>, 73.1% NiO) and Ni/NiO@La<sub>2</sub>O<sub>3</sub>/C (6.3% La<sub>2</sub>O<sub>3</sub>, 67.0% NiO) measured in 1 M KOH. The different contents of NiO are based on the XPS measurements.

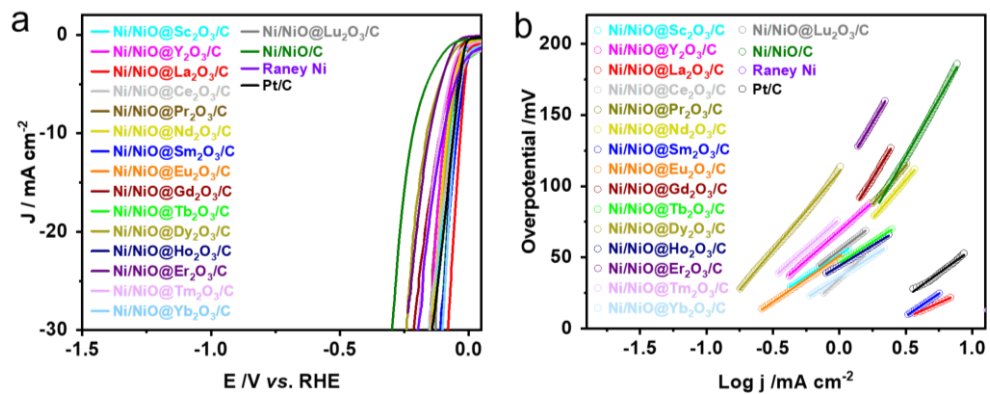

**Supplementary Figure 38.** (a) LSV curves and (b) corresponding Tafel slopes of 16 kinds of Ni/NiO@RE<sub>2</sub>O<sub>3</sub>/C, Ni/NiO/C, Raney Ni and commercial Pt/C measured in 1 M KOH.

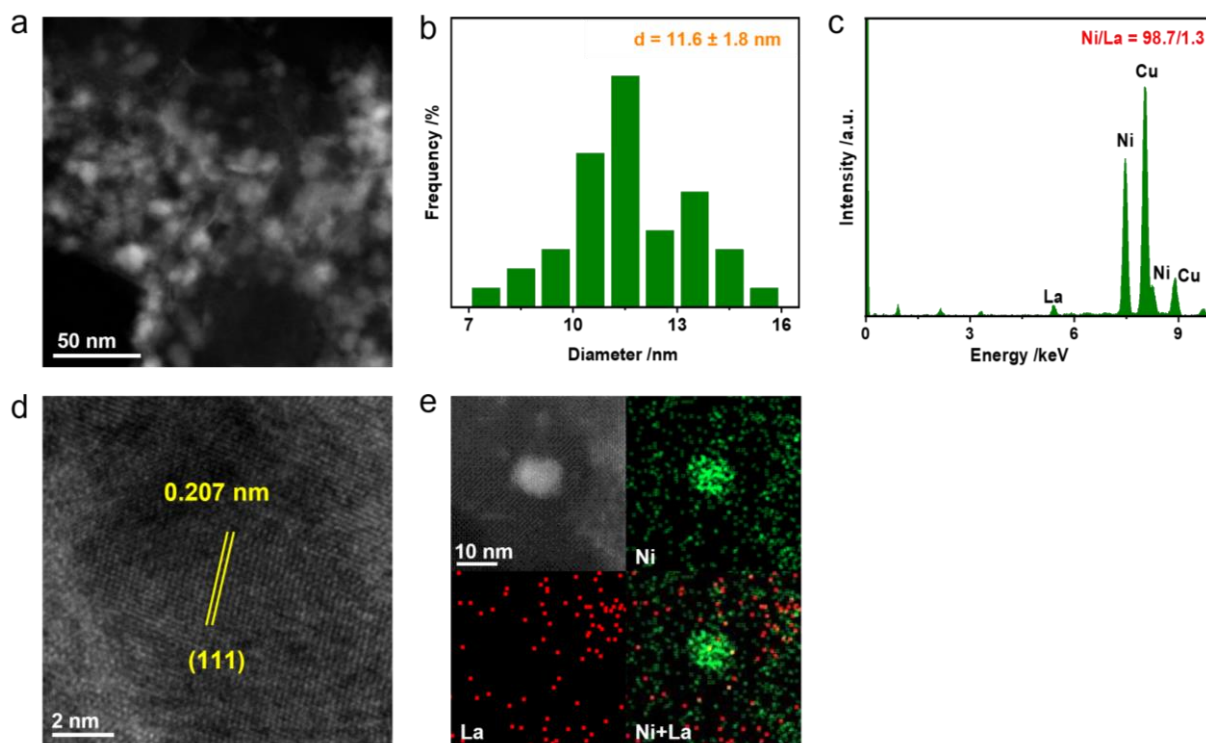

**Supplementary Figure 39.** (a) HAADF-STEM image, (b) diameter distribution, (c) TEM-EDS, (d) HRTEM image and (e) HAADF-STEM image with elemental mappings of Ni/NiO@La<sub>2</sub>O<sub>3</sub>/C after the HER durability test for 130 h.

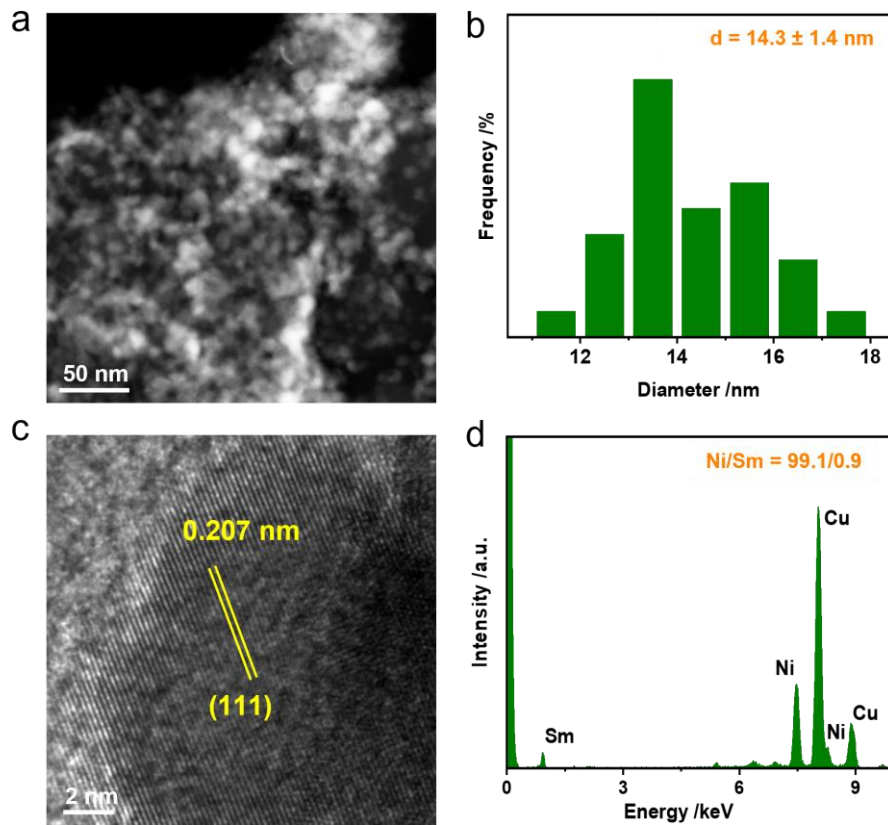

**Supplementary Figure 40.** (a) HAADF-STEM image, (b) diameter distribution, (c) SEM-EDS and (d) HRTEM image of Ni/NiO@Sm<sub>2</sub>O<sub>3</sub>/C after the HER durability test for 130 h.

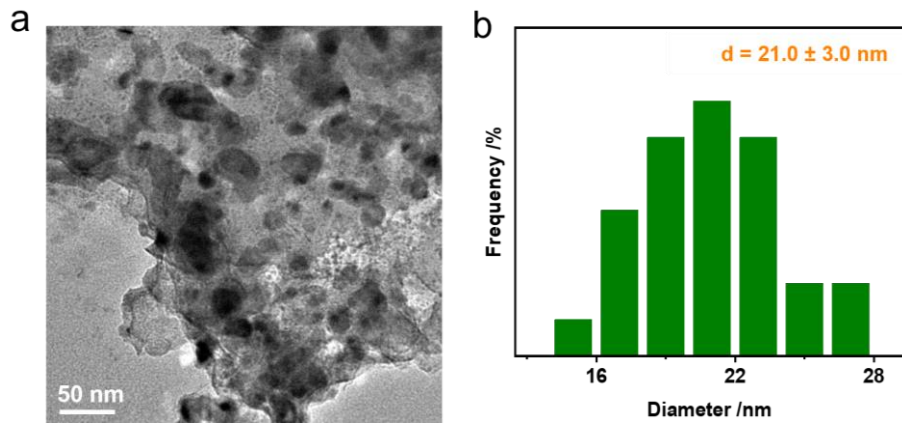

**Supplementary Figure 41.** (a) TEM image and (b) diameter distribution of Ni/NiO/C after the HER durability test for 130 h.

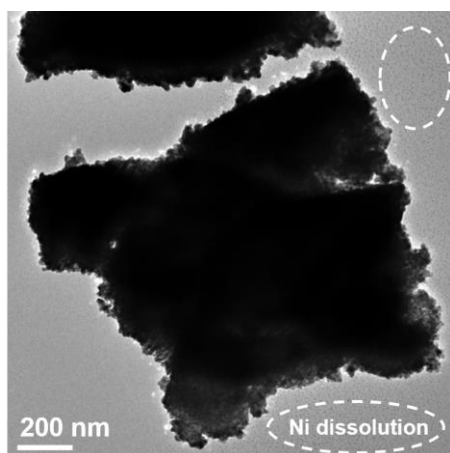

**Supplementary Figure 42.** TEM image of Raney Ni after the HER durability test for 24 h. The white dotted circles display the Ni dissolution.

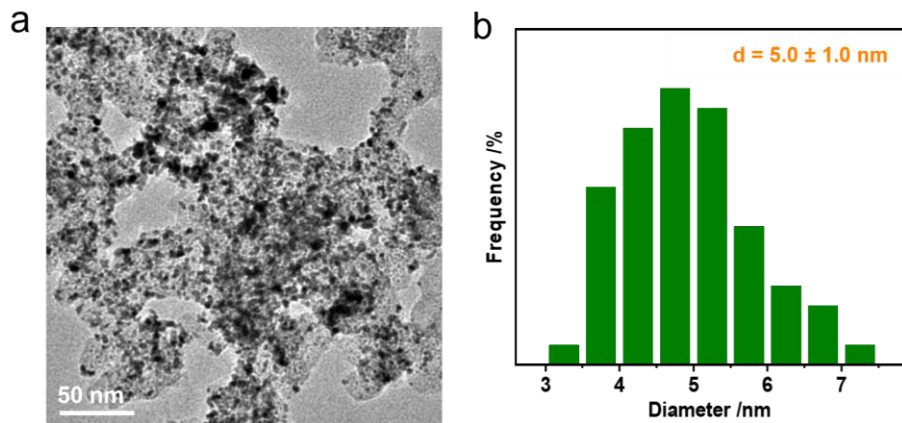

**Supplementary Figure 43.** (a) TEM image and (b) diameter distribution of commercial Pt/C after the HER durability test for 24 h.

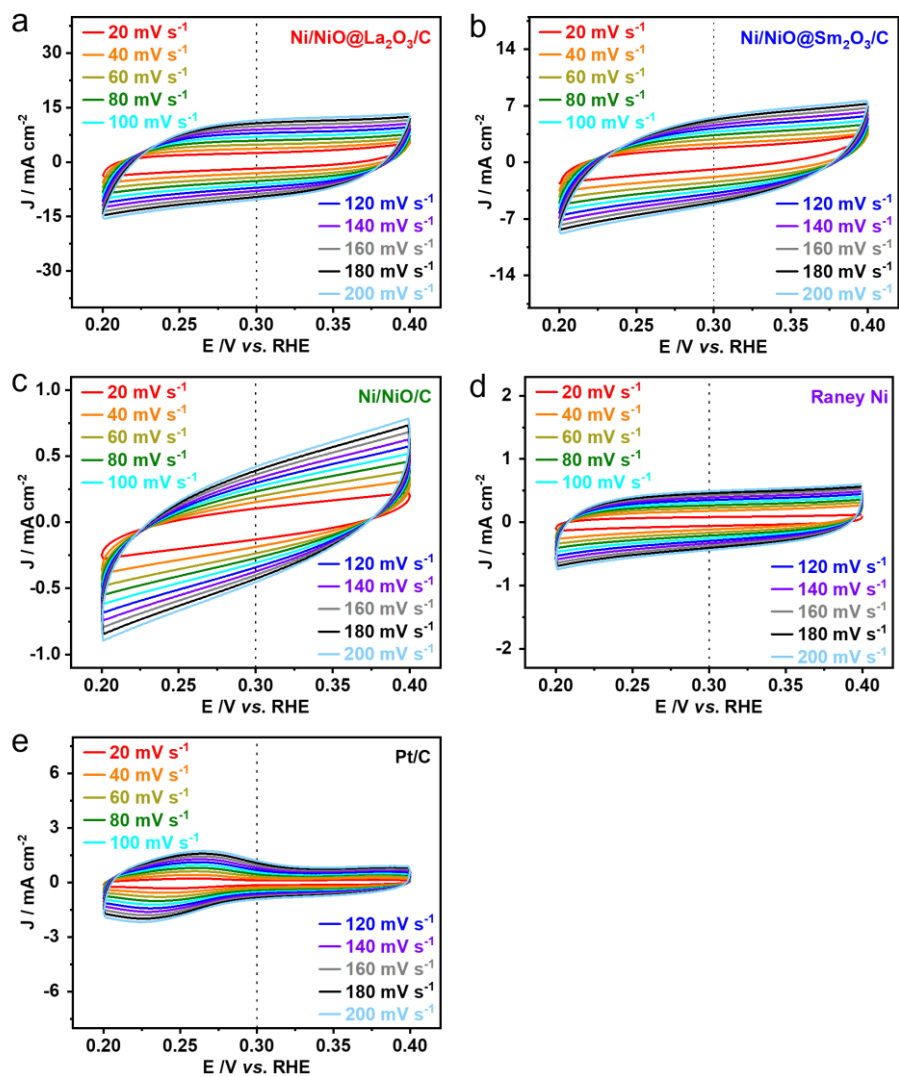

**Supplementary Figure 44.** CV curves of (a) Ni/NiO@La<sub>2</sub>O<sub>3</sub>/C, (b) Ni/NiO@Sm<sub>2</sub>O<sub>3</sub>/C, (c) Ni/NiO/C, (d) Raney Ni and (e) commercial Pt/C with different scan rates from 20 to 200 mV s<sup>-1</sup> in 1 M KOH.

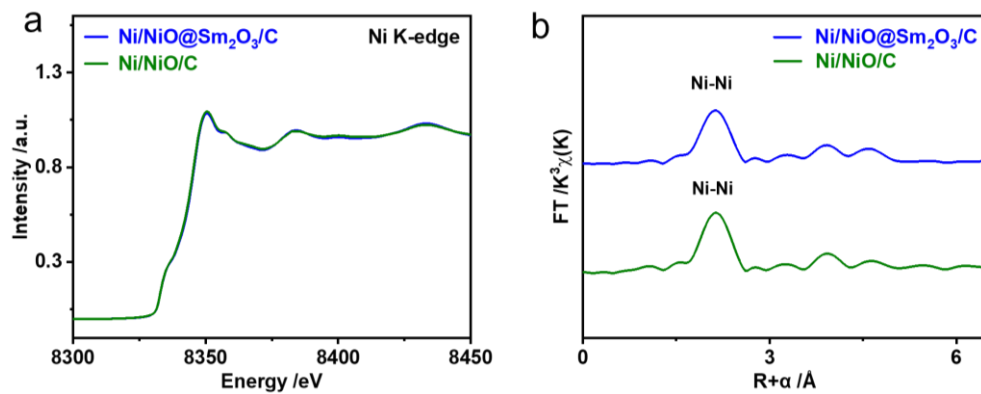

**Supplementary Figure 45.** (a) Ni K-edge XANES spectra and (b) corresponding FT-EXAFS spectra of Ni/NiO@Sm<sub>2</sub>O<sub>3</sub>/C and Ni/NiO/C.

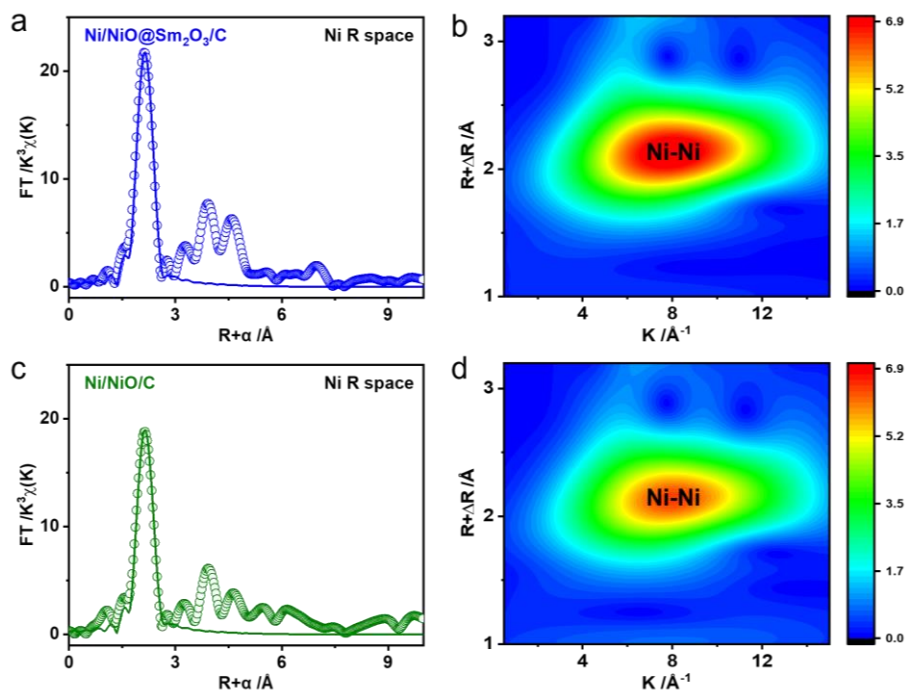

**Supplementary Figure 46.** (a, c) Ni K-edge EXAFS analyses in R and k spaces for (a) Ni/NiO@Sm<sub>2</sub>O<sub>3</sub>/C and (c) Ni/NiO/C. (b, d) WT analyses of Ni K-edge FT-EXAFS data for (b) Ni/NiO@Sm<sub>2</sub>O<sub>3</sub>/C and (d) Ni/NiO/C.

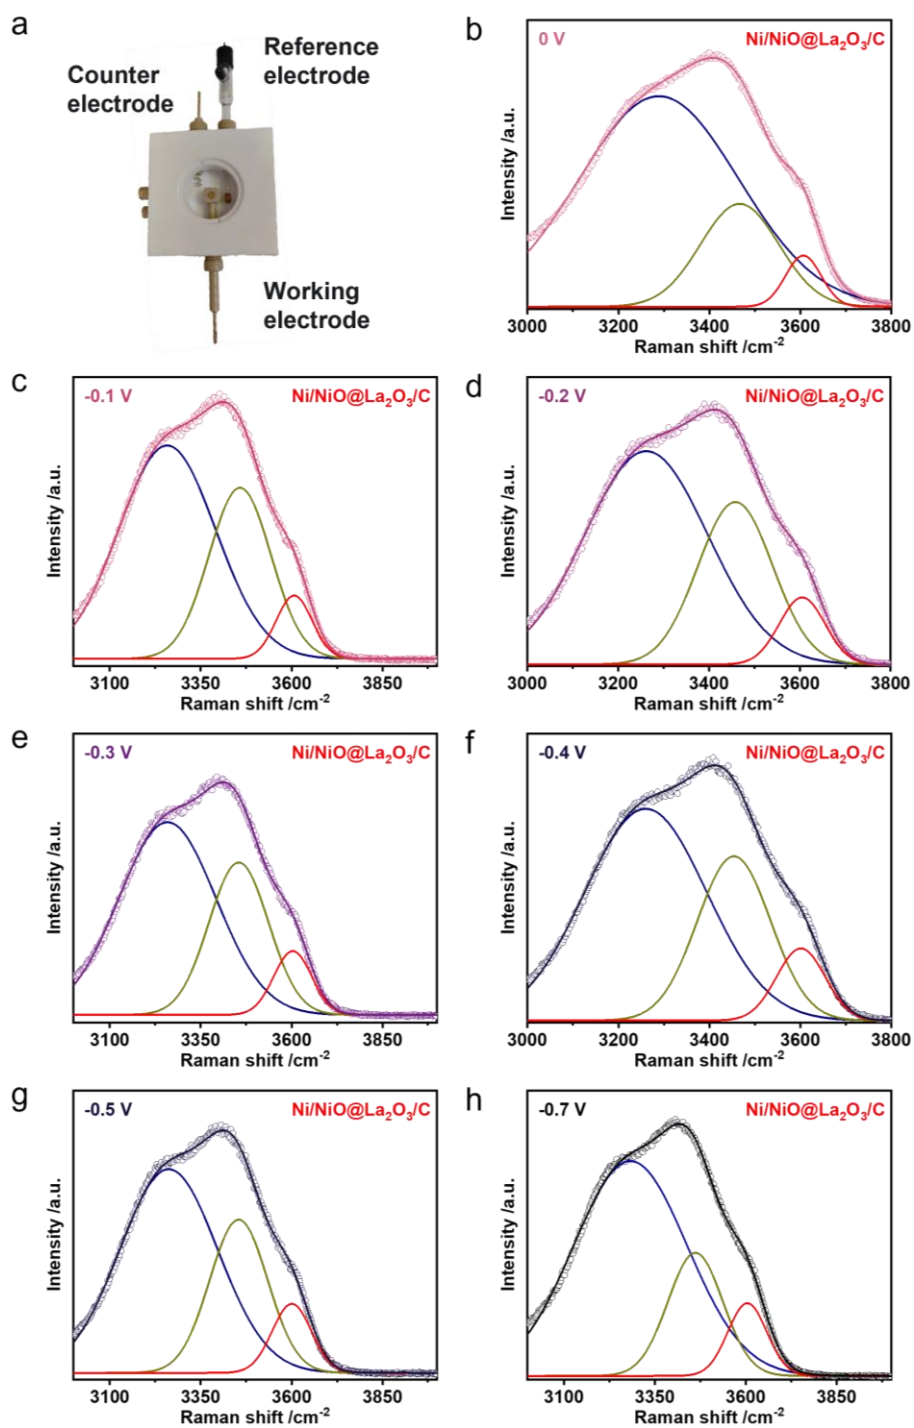

**Supplementary Figure 47.** (a) Electrolytic cell used for *in-situ* Raman spectrum testing. (b-h) Enlarged *in-situ* Raman spectra (with peak fitting) of Ni/NiO@La<sub>2</sub>O<sub>3</sub>/C for alkaline HER at (b) 0 V, (c) -0.1 V, (d) -0.2 V, (e) -0.3 V, (f) -0.4 V, (g) -0.5 V and (h) -0.7 V vs. RHE.

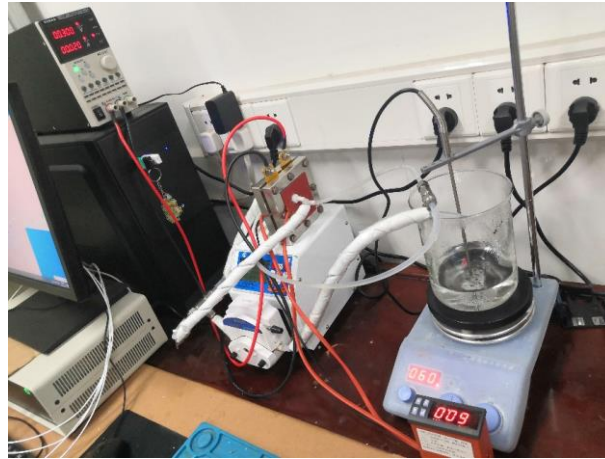

**Supplementary Figure 48.** The whole MEA test system of AEMWE used in this work.

**Supplementary Table 1.** Ni 3*d* binding energy and Ni<sup>2+</sup>/Ni<sup>0</sup> ratio results for Ni/NiO@La<sub>2</sub>O<sub>3</sub>/C with different etching degrees in this work, as revealed by XPS.

| Sample                                                                                          | Ni <sup>2+</sup>             |                              | Ni <sup>0</sup>              |                              | Ni <sup>2+</sup> /Ni <sup>0</sup> | La <sup>3+</sup>             |                              |
|-------------------------------------------------------------------------------------------------|------------------------------|------------------------------|------------------------------|------------------------------|-----------------------------------|------------------------------|------------------------------|
|                                                                                                 | Ni 2 <i>p</i> <sub>3/2</sub> | Ni 2 <i>p</i> <sub>1/2</sub> | Ni 2 <i>p</i> <sub>3/2</sub> | Ni 2 <i>p</i> <sub>1/2</sub> | ratio                             | La 3 <i>d</i> <sub>5/2</sub> | La 3 <i>d</i> <sub>3/2</sub> |
| <b>initial<br/>Ni/NiO@La<sub>2</sub>O<sub>3</sub>/C (S<sub>0</sub>)</b>                         | <b>855.78</b>                | <b>873.88</b>                | <b>852.98</b>                | <b>870.18</b>                | <b>82.9/17.1</b>                  | <b>838.83</b>                | <b>856.73</b>                |
| Ni/NiO@La <sub>2</sub> O <sub>3</sub> /C after<br>the 1 <sup>st</sup> etching (S <sub>1</sub> ) | 855.33                       | 873.26                       | 853.22                       | 870.33                       | 86.5/13.5                         | 839.27                       | 856.16                       |
| Ni/NiO@La <sub>2</sub> O <sub>3</sub> /C after<br>the 2 <sup>nd</sup> etching (S <sub>2</sub> ) | 855.86                       | 873.94                       | 853.08                       | 871.02                       | 71.6/28.4                         | 839.27                       | 857.17                       |
| Ni/NiO@La <sub>2</sub> O <sub>3</sub> /C after<br>the 3 <sup>rd</sup> etching (S <sub>3</sub> ) | 855.14                       | 873.21                       | 852.68                       | 870.22                       | 66.4/33.6                         | 838.91                       | 856.81                       |
| Ni/NiO@La <sub>2</sub> O <sub>3</sub> /C after<br>the 4 <sup>th</sup> etching (S <sub>4</sub> ) | 855.45                       | 873.44                       | 853.51                       | 870.62                       | 64.8/35.2                         | 838.85                       | 856.45                       |
| Ni/NiO@La <sub>2</sub> O <sub>3</sub> /C after<br>the 5 <sup>th</sup> etching (S <sub>5</sub> ) | 856.3                        | 873.41                       | 853.4                        | 870.51                       | 62.2/37.8                         | 838.93                       | 855.53                       |

**Supplementary Table 2.** Ni K-edge FT-EXAFS parameters of Ni/NiO@La<sub>2</sub>O<sub>3</sub>/C, Ni/NiO@Sm<sub>2</sub>O<sub>3</sub>/C, Ni/NiO/C, Ni foil and NiO.

| Sample                                   | bond type | CN        | R (Å)       | $\sigma^2$ (Å <sup>2</sup> ) | R-factor (%) |
|------------------------------------------|-----------|-----------|-------------|------------------------------|--------------|
| Ni/NiO@La <sub>2</sub> O <sub>3</sub> /C | Ni-Ni     | 7.4 ± 1.1 | 2.49 ± 0.01 | 0.006 ± 0.001                | 0.023        |
| Ni/NiO@Sm <sub>2</sub> O <sub>3</sub> /C | Ni-Ni     | 6.9 ± 1.3 | 2.49 ± 0.01 | 0.006 ± 0.001                | 0.017        |
| Ni/NiO/C                                 | Ni-Ni     | 9.8 ± 1.0 | 2.49 ± 0.01 | 0.006 ± 0.001                | 0.032        |
| Ni foil                                  | Ni-Ni     | 12        | 2.95        | 6.5                          | 0.004        |
| NiO                                      | Ni-O      | 6         | 2.08        | 5.6                          | 0.001        |

R, radial distance between absorber and backscatter atoms.

CN, coordination number.

$\sigma^2$ , Debye-Waller factor value.

The passive electron reduction factor ( $S_0^2$ ) was fixed to 1.00, as determined from Pt foil fitting.

R-factor (%) indicates the goodness of the fit.

**Supplementary Table 3.** Overpotentials at 10 mA cm<sup>-2</sup> of different Ni/NiO@La<sub>2</sub>O<sub>3</sub>/C catalysts with different contents of La<sub>2</sub>O<sub>3</sub> and NiO. The different contents of La<sub>2</sub>O<sub>3</sub> are based on the SEM-EDS measurements, while the different contents of NiO are based on the XPS measurements.

| Sample                                                                                      | Overpotential (mV) |
|---------------------------------------------------------------------------------------------|--------------------|
| Ni/NiO@La <sub>2</sub> O <sub>3</sub> /C (18.2% La <sub>2</sub> O <sub>3</sub> , 82.9% NiO) | 62                 |
| Ni/NiO@La <sub>2</sub> O <sub>3</sub> /C (9.9% La <sub>2</sub> O <sub>3</sub> , 83.0% NiO)  | 54                 |
| <b>Ni/NiO@La<sub>2</sub>O<sub>3</sub>/C (6.7% La<sub>2</sub>O<sub>3</sub>, 82.9% NiO)</b>   | <b>32</b>          |
| Ni/NiO@La <sub>2</sub> O <sub>3</sub> /C (3.0% La <sub>2</sub> O <sub>3</sub> , 82.9% NiO)  | 81                 |
| Ni/NiO@La <sub>2</sub> O <sub>3</sub> /C (6.3% La <sub>2</sub> O <sub>3</sub> , 91.9% NiO)  | 125                |
| Ni/NiO@La <sub>2</sub> O <sub>3</sub> /C (6.8% La <sub>2</sub> O <sub>3</sub> , 86.6% NiO)  | 58                 |
| <b>Ni/NiO@La<sub>2</sub>O<sub>3</sub>/C (6.7% La<sub>2</sub>O<sub>3</sub>, 82.9% NiO)</b>   | <b>32</b>          |
| Ni/NiO@La <sub>2</sub> O <sub>3</sub> /C (6.7% La <sub>2</sub> O <sub>3</sub> , 73.1% NiO)  | 105                |
| Ni/NiO@La <sub>2</sub> O <sub>3</sub> /C (6.3% La <sub>2</sub> O <sub>3</sub> , 67.0% NiO)  | 152                |

**Supplementary Table 4.** Overpotentials at 10 mA cm<sup>-2</sup> and Tafel slopes of 16 kinds of Ni/NiO@RE<sub>2</sub>O<sub>3</sub>/C, Ni/NiO/C, Raney Ni and commercial Pt/C.

| Sample                                      | Overpotential (mV) | Tafel slope (mV dec <sup>-1</sup> ) |
|---------------------------------------------|--------------------|-------------------------------------|
| <b>Ni/NiO@La<sub>2</sub>O<sub>3</sub>/C</b> | <b>32</b>          | <b>29.2</b>                         |
| Ni/NiO@Sc <sub>2</sub> O <sub>3</sub> /C    | 73                 | 60.3                                |
| Ni/NiO@Y <sub>2</sub> O <sub>3</sub> /C     | 93                 | 81.8                                |
| Ni/NiO@Ce <sub>2</sub> O <sub>3</sub> /C    | 63                 | 85.6                                |
| Ni/NiO@Pr <sub>2</sub> O <sub>3</sub> /C    | 93                 | 108.5                               |
| Ni/NiO@Nd <sub>2</sub> O <sub>3</sub> /C    | 83                 | 108.3                               |
| Ni/NiO@Sm <sub>2</sub> O <sub>3</sub> /C    | 45                 | 63.4                                |
| Ni/NiO@Eu <sub>2</sub> O <sub>3</sub> /C    | 78                 | 64.5                                |
| Ni/NiO@Gd <sub>2</sub> O <sub>3</sub> /C    | 112                | 151.0                               |
| Ni/NiO@Tb <sub>2</sub> O <sub>3</sub> /C    | 62                 | 59.0                                |
| Ni/NiO@Dy <sub>2</sub> O <sub>3</sub> /C    | 163                | 110.2                               |
| Ni/NiO@Ho <sub>2</sub> O <sub>3</sub> /C    | 60                 | 57.0                                |
| Ni/NiO@Er <sub>2</sub> O <sub>3</sub> /C    | 152                | 157.4                               |
| Ni/NiO@Tm <sub>2</sub> O <sub>3</sub> /C    | 112                | 81.9                                |
| Ni/NiO@Yb <sub>2</sub> O <sub>3</sub> /C    | 54                 | 59.5                                |
| Ni/NiO@Lu <sub>2</sub> O <sub>3</sub> /C    | 77                 | 70.9                                |
| Ni/NiO/C                                    | 216                | 162.8                               |
| Raney Ni                                    | 99                 | 139.3                               |
| commercial Pt/C                             | 59                 | 67.3                                |

**Supplementary Table 5.** Overpotentials at 10 mA cm<sup>-2</sup> and Tafel slopes of Ni/NiO@La<sub>2</sub>O<sub>3</sub>/C and non-noble metal-based catalysts reported in recent five years for alkaline HER measured in 1.0 M KOH.

| Sample                                                                                                                | Overpotential (mV) | Tafel slope (mV dec <sup>-1</sup> ) | Ref.                                                              |
|-----------------------------------------------------------------------------------------------------------------------|--------------------|-------------------------------------|-------------------------------------------------------------------|
| Ni/NiO@La <sub>2</sub> O <sub>3</sub> /C                                                                              | 32                 | 29.2                                | This work                                                         |
| Hom-NiO/Cu                                                                                                            | 33                 | 51                                  | <i>ACS Nano</i> <b>2021</b> , <i>15</i> , 15017-15026.            |
| NiCo <sub>2</sub> S <sub>4</sub> /ReS <sub>2</sub>                                                                    | 85                 | 78.3                                | <i>Adv. Funct. Mater.</i> <b>2023</b> , <i>33</i> , 2210072       |
| I-Ni@C                                                                                                                | 78                 | 60                                  | <i>J. Am. Chem. Soc.</i> <b>2024</b> , <i>146</i> , 26844-26854   |
| NiS <sub>2</sub> -Vs 5.9%                                                                                             | 108                | 82                                  | <i>Nano-Micro Lett.</i> <b>2024</b> , <i>16</i> , 63              |
| W/WO <sub>2</sub>                                                                                                     | 35                 | 34                                  | <i>Nat. Commun.</i> <b>2023</b> , <i>14</i> , 5363                |
| P-NiMoO <sub>4</sub>                                                                                                  | 45                 | 65                                  | <i>ACS Nano</i> <b>2024</b> , <i>18</i> , 3791-3800               |
| Mn <sub>0.25</sub> Ni <sub>0.75</sub> O                                                                               | 266                | 46.15                               | <i>J. Energy Chem.</i> <b>2023</b> , <i>86</i> , 167-179          |
| PS-C                                                                                                                  | 261                | 143.58                              | <i>Adv. Funct. Mater.</i> <b>2022</b> , <i>32</i> , 2112367       |
| NiCo DASs/N-C                                                                                                         | 189                | 72.5                                | <i>Adv. Funct. Mater.</i> <b>2023</b> , <i>33</i> , 2210867       |
| Ni <sub>3</sub> N@W <sub>5</sub> N <sub>4</sub>                                                                       | 60                 | 56                                  | <i>Angew. Chem. Int. Ed.</i> <b>2025</b> , <i>64</i> , e202414647 |
| MoS <sub>2</sub> /NiPS <sub>3</sub>                                                                                   | 112                | 64                                  | <i>Adv. Mater.</i> <b>2022</b> , <i>34</i> , 2203615              |
| Ni <sub>0.2</sub> Fe <sub>0.8</sub> S <sub>2</sub>                                                                    | 121                | 55                                  | <i>Energy Environ. Sci.</i> <b>2022</b> , <i>15</i> , 633-644     |
| Ni <sub>3</sub> S <sub>2</sub> /Cr <sub>2</sub> S <sub>3</sub> @NF                                                    | 55                 | 87                                  | <i>J. Am. Chem. Soc.</i> <b>2022</b> , <i>144</i> , 6028-6039     |
| [Fe <sub>2</sub> L <sub>2</sub> (H <sub>2</sub> O) <sub>2</sub> -(SO <sub>4</sub> ) <sub>2</sub> ](CH <sub>4</sub> O) | 62                 | 45.7                                | <i>Angew. Chem. Int. Ed.</i> <b>2023</b> , <i>62</i> , e202307832 |

|                                                    |     |      |                                                            |
|----------------------------------------------------|-----|------|------------------------------------------------------------|
| WN-Ni@N,P-CNT                                      | 70  | 59.8 | <i>Appl. Catal. B</i> <b>2021</b> , 298, 120511            |
| Ni@NCW-2.0                                         | 158 | 36   | <i>Adv. Mater.</i> <b>2024</b> , 36, 2304917               |
| Ni <sub>SA</sub> -O/Mo <sub>2</sub> C              | 133 | 83.6 | <i>Nat. Commun.</i> <b>2024</b> , 15, 1342                 |
| Fe-Ni <sub>2</sub> P@C/NF                          | 75  | 45   | <i>Appl. Catal. B</i> <b>2022</b> , 307, 121170            |
| NiCo@C-NiCoMoO/NF                                  | 39  | 63.5 | <i>Nano-Micro Lett.</i> <b>2021</b> , 13, 77               |
| Cr-Ni NHs                                          | 75  | 124  | <i>J. Am. Chem. Soc.</i> <b>2021</b> , 143, 1399-1408      |
| Ni-GF/VC                                           | 128 | 80   | <i>Adv. Energy Mater.</i> <b>2020</b> , 10, 2002260        |
| B-Fe <sub>7</sub> S <sub>8</sub> /FeS <sub>2</sub> | 113 | 57.4 | <i>Adv. Funct. Mater.</i> <b>2022</b> , 32, 2107802        |
| W-ACs                                              | 53  | 38   | <i>Nat. Commun.</i> <b>2022</b> , 13, 763                  |
| CoSe <sub>2</sub> @NC                              | 98  | 63.4 | <i>Angew. Chem. Int. Ed.</i> <b>2021</b> , 60, 21575-21582 |
| (MoVNb)Se <sub>2</sub>                             | 80  | 55   | <i>Adv. Mater.</i> <b>2022</b> , 34, 2205524               |
| NiCoP                                              | 56  | 88.9 | <i>Adv. Energy Mater.</i> <b>2023</b> , 13, 2300499        |
| CoSe <sub>2</sub> /a-CoP                           | 151 | 80   | <i>Adv. Mater.</i> <b>2022</b> , 34, 2110631               |
| In5                                                | 67  | 107  | <i>Angew. Chem. Int. Ed.</i> <b>2023</b> , 62, e202301269  |
| S-NiBDC                                            | 100 | 75   | <i>Nat. Commun.</i> <b>2022</b> , 13, 6486                 |
| CoPGT                                              | 103 | 66.1 | <i>Nat. Commun.</i> <b>2023</b> , 14, 7708                 |
| Fe-Ni <sub>5</sub> P <sub>4</sub> /NiFeOH          | 197 | 94   | <i>Appl. Catal. B</i> <b>2021</b> , 291, 119987            |
| Ni <sub>2</sub> P-NiSe <sub>2</sub>                | 66  | 72.6 | <i>Appl. Catal. B</i> <b>2020</b> , 262,                   |

|                                                                      |      |      |                                                                      |
|----------------------------------------------------------------------|------|------|----------------------------------------------------------------------|
|                                                                      |      |      | 118245                                                               |
| MCu <sub>0.10</sub> -BNiMo                                           | 156  | 40.4 | <i>Adv. Mater.</i> <b>2024</b> , <i>36</i> ,<br>2313156              |
| Fe(OH) <sub>x</sub> @CuMOF                                           | 112  | 76   | <i>Sci. Adv.</i> <b>2021</b> , <i>7</i> ,<br>eabg2580                |
| MoC-Mo <sub>2</sub> C-790                                            | 98.2 | 62   | <i>Nat. Commun.</i> <b>2021</b> , <i>12</i> ,<br>6776                |
| Cr-Ni film                                                           | 75   | 72   | <i>J. Am. Chem. Soc.</i> <b>2021</b> ,<br><i>143</i> , 1399          |
| Cu <sub>1</sub> Co <sub>2</sub> -Ni <sub>2</sub> P/NF                | 61   | 14.4 | <i>Adv. Mater.</i> <b>2023</b> , <i>35</i> ,<br>2305598              |
| CoFe-P NAs/IF                                                        | 40   | 62   | <i>J. Mater. Chem. A</i> <b>2024</b> ,<br><i>12</i> , 5331-5339      |
| AlPMoO <sub>2</sub> @Mo <sub>2</sub> C                               | 40   | 45   | <i>Nat Commun.</i> <b>2025</b> , <i>16</i> ,<br>418                  |
| GDY/MoO <sub>3</sub>                                                 | 170  | 70   | <i>J. Am. Chem. Soc.</i> <b>2021</b> ,<br><i>143</i> , 8720-8730     |
| AlO@Mo <sub>2</sub> N-NrGO                                           | 111  | 64   | <i>Adv. Sci.</i> <b>2022</b> , <i>9</i> ,<br>2204949                 |
| Ni <sub>3</sub> S <sub>2</sub> @BLMoS <sub>2</sub>                   | 78   | 54   | <i>Adv. Mater.</i> <b>2022</b> , <i>34</i> ,<br>2202195              |
| Co-MoS <sub>2</sub> @CoS <sub>2</sub>                                | 76   | 73   | <i>Angew. Chem. Int. Ed.</i><br><b>2022</b> , <i>61</i> , e202114899 |
| Mo <sub>2</sub> C/MoC/CNT                                            | 82   | 42   | <i>Nat. Commun.</i> <b>2022</b> , <i>13</i> ,<br>3338                |
| Zn-MoC/Mo <sub>2</sub> C-0.2                                         | 139  | 49.8 | <i>Nano Energy</i> , <b>2022</b> , <i>98</i> ,<br>107232             |
| MoO <sub>2</sub> /MoS <sub>2</sub> /C                                | 77   | 41   | <i>Adv. Funct. Mater.</i> <b>2021</b> ,<br><i>31</i> , 2101715       |
| Co <sub>2</sub> Mo <sub>3</sub> O <sub>8</sub> /MoO <sub>2</sub> /NF | 23   | 20   | <i>Appl. Catal. B: Environ.</i><br><b>2023</b> , <i>338</i> , 123015 |
| Mo <sub>2</sub> C@NG                                                 | 135  | 41   | <i>Adv. Funct. Mater.</i> <b>2022</b> ,<br><i>32</i> , 2108167       |
| Fe-NiS <sub>2</sub> @NaBH <sub>4</sub>                               | 114  | 65   | <i>ACS Catal.</i> <b>2025</b> , <i>15</i> ,<br>13948-13957           |

|                                                                                  |      |       |                                                               |
|----------------------------------------------------------------------------------|------|-------|---------------------------------------------------------------|
| V-NiS/NiS <sub>2</sub>                                                           | 220  | 72    | <i>Adv. Energy Mater.</i> <b>2023</b> ,<br>13, 2300978        |
| NiMoCu                                                                           | 49   | 46    | <i>Adv. Energy Mater.</i> <b>2025</b> ,<br>15, 2501852        |
| N-NiMo                                                                           | 95   | 63    | <i>Chem. Mater.</i> <b>2024</b> , 36,<br>4164                 |
| Ni <sub>4</sub> Mo/N-NiMoO <sub>4</sub>                                          | 35   | 68    | <i>Appl. Catal. B</i> <b>2025</b> , 361,<br>124660            |
| NiMoFe HI                                                                        | 73   | 121   | <i>ACS Catal.</i> <b>2024</b> , 14,<br>18003                  |
| d-MoNi                                                                           | 121  | 27    | <i>Adv. Mater.</i> <b>2024</b> , 36,<br>2402156               |
| NiCoCu-Mo <sub>0.078</sub> /CF                                                   | 35   | 50.12 | <i>Adv. Funct. Mater.</i> <b>2024</b> ,<br>34, 2404055        |
| Ni/Y <sub>2</sub> O <sub>3</sub>                                                 | 61.1 | 52.8  | <i>Adv. Energy Mater.</i> <b>2024</b> ,<br>14, 2303563        |
| Co <sub>0.59</sub> Ni <sub>0.41</sub> C <sub>2</sub> O <sub>4</sub> @PANI/<br>NF | 43   | 36.41 | <i>Adv. Funct. Mater.</i> <b>2023</b> ,<br>33, 2211576        |
| Co <sub>50</sub> Ni-C/NF                                                         | 30   | 45.1  | <i>J. Colloid Interface Sci.</i><br><b>2026</b> , 707, 139746 |
| Fe <sub>2</sub> O <sub>3</sub> /CuO                                              | 70   | 97.9  | <i>Adv. Energy Mater.</i> <b>2022</b> ,<br>12, 2200067        |
| Ni <sub>SA</sub> Fe <sub>SA</sub> -Ni <sub>X</sub> Fe/CNT                        | 64   | 53.1  | <i>ACS Catal.</i> <b>2022</b> , 12,<br>1167-1179              |
| Co/CoMoN                                                                         | 61   | 50.2  | <i>Adv. Sci.</i> <b>2022</b> , 9,<br>e2105313                 |
| Ni/MoN/rNS                                                                       | 67   | 52    | <i>Adv. Sci.</i> <b>2022</b> , 9,<br>e2105869                 |

**Supplementary Table 6.** Ni 2*p* and La/Sm 3*d* binding energies as well as Ni<sup>2+</sup>/Ni<sup>0</sup> ratios for Ni/NiO@La<sub>2</sub>O<sub>3</sub>/C with different contents of NiO, Ni/NiO@Sm<sub>2</sub>O<sub>3</sub>/C (6.4% Sm<sub>2</sub>O<sub>3</sub>, 83.2% NiO) and Ni/NiO/C in this work, as revealed by XPS.

| Sample                                                                                        | Ni <sup>2+</sup>             |                              | Ni <sup>0</sup>              |                              | Ni <sup>2+</sup> /Ni <sup>0</sup> | RE <sup>3+</sup>             |                              |
|-----------------------------------------------------------------------------------------------|------------------------------|------------------------------|------------------------------|------------------------------|-----------------------------------|------------------------------|------------------------------|
|                                                                                               | Ni 2 <i>p</i> <sub>3/2</sub> | Ni 2 <i>p</i> <sub>1/2</sub> | Ni 2 <i>p</i> <sub>3/2</sub> | Ni 2 <i>p</i> <sub>1/2</sub> | ratio                             | RE 3 <i>d</i> <sub>5/2</sub> | RE 3 <i>d</i> <sub>3/2</sub> |
| Ni/NiO@La <sub>2</sub> O <sub>3</sub> /C (6.3%<br>La <sub>2</sub> O <sub>3</sub> , 91.9% NiO) | 855.50                       | 873.10                       | 853.00                       | 870.11                       | 91.9/8.1                          | 838.83                       | 855.43                       |
| Ni/NiO@La <sub>2</sub> O <sub>3</sub> /C (6.8%<br>La <sub>2</sub> O <sub>3</sub> , 86.6% NiO) | 855.89                       | 873.53                       | 852.70                       | 870.48                       | 86.6/13.4                         | 838.66                       | 855.26                       |
| <b>Ni/NiO@La<sub>2</sub>O<sub>3</sub>/C (6.7%<br/>La<sub>2</sub>O<sub>3</sub>, 82.9% NiO)</b> | <b>855.78</b>                | <b>873.88</b>                | <b>852.98</b>                | <b>870.18</b>                | <b>82.9/17.1</b>                  | <b>838.83</b>                | <b>856.73</b>                |
| Ni/NiO@La <sub>2</sub> O <sub>3</sub> /C (6.7%<br>La <sub>2</sub> O <sub>3</sub> , 73.1% NiO) | 855.79                       | 873.64                       | 852.82                       | 870.23                       | 73.1/26.9                         | 838.52                       | 855.12                       |
| Ni/NiO@La <sub>2</sub> O <sub>3</sub> /C (6.3%<br>La <sub>2</sub> O <sub>3</sub> , 67.0% NiO) | 855.58                       | 873.70                       | 852.81                       | 869.92                       | 67.0/33.0                         | 836.58                       | 853.18                       |
| Ni/NiO@Sm <sub>2</sub> O <sub>3</sub> /C<br>(6.4% Sm <sub>2</sub> O <sub>3</sub> , 83.2% NiO) | 855.78                       | 873.88                       | 852.88                       | 870.28                       | 93.2/16.8                         | 1082.09                      | 1109.22                      |
| Ni/NiO/C                                                                                      | 856.08                       | 874.18                       | 852.88                       | 872.58                       | 68.4/31.6                         | /                            | /                            |

**Supplementary Table 7.** MEA voltages and current densities as well as cathode and anode catalysts used in this work and other works reported in recent five years for AEMWE.

| Cathode catalyst                                   | Anode catalyst                                                     | Voltage @ Current density                                                                      | Ref.                                                      |
|----------------------------------------------------|--------------------------------------------------------------------|------------------------------------------------------------------------------------------------|-----------------------------------------------------------|
| Ni/NiO@La <sub>2</sub> O <sub>3</sub> /C           | NiFe-LDH@NF                                                        | 1.5 V @ 0.5 A cm <sup>-2</sup><br>1.6 V @ 1 A cm <sup>-2</sup><br>1.7 V @ 2 A cm <sup>-2</sup> | This work                                                 |
| Ni <sub>3</sub> N@W <sub>5</sub> N <sub>4</sub>    | NFP                                                                | 2.01 V @ 1 A cm <sup>-2</sup>                                                                  | <i>Angew. Chem. Int. Ed.</i> <b>2025</b> , 64, e202414647 |
| NiFeCr-LDH@NF                                      | Ni <sub>3</sub> S <sub>2</sub> /Cr <sub>2</sub> S <sub>3</sub> @NF | 2.04 V @ 0.75 A cm <sup>-2</sup>                                                               | <i>J. Am. Chem. Soc.</i> <b>2022</b> , 144, 6028-6039     |
| Co-1T MoS <sub>2</sub>                             | NiFe LDH                                                           | 2.55 V @ 0.5 A cm <sup>-2</sup>                                                                | <i>Angew. Chem. Int. Ed.</i> <b>2023</b> , 62, e202313845 |
| FeP-CoP/NC                                         | FeP-CoP/NC                                                         | 2.10 V @ 0.75 A cm <sup>-2</sup>                                                               | <i>Nat. Commun.</i> <b>2021</b> , 12, 4143                |
| VCoP-2/Ni                                          | VCoP-2/Ni                                                          | 1.90 V @ 1 A cm <sup>-2</sup>                                                                  | <i>Energy Environ. Sci.</i> <b>2022</b> , 15, 1882-1892   |
| Acta 4030                                          | Acta 3030                                                          | 1.90 V @ 0.5 A cm <sup>-2</sup>                                                                | <i>Joule.</i> <b>2021</b> , 5, 1776-1799                  |
| NiCoP@NiFeP                                        | NiCoP@NiFeP                                                        | 1.93 V @ 1 A cm <sup>-2</sup>                                                                  | <i>J. Mater. Chem. A.</i> <b>2022</b> , 10, 10209-10218   |
| CoNi-Ti <sub>3</sub> C <sub>2</sub> T <sub>x</sub> | CoNi-Ti <sub>3</sub> C <sub>2</sub> T <sub>x</sub>                 | 1.87 V @ 0.5 A cm <sup>-2</sup>                                                                | <i>ACS Nano</i> <b>2024</b> , 18, 4256-4268               |
| Ni <sub>4</sub> Mo-MoO <sub>x</sub>                | NiFe                                                               | 1.75 V @ 1 A cm <sup>-2</sup>                                                                  | <i>Energy Environ. Sci.</i> <b>2025</b> , 18, 1533-1543   |
| NiFeP <sub>x</sub>                                 | NiFe LDH                                                           | 1.98 V @ 0.15 A cm <sup>-2</sup>                                                               | <i>J. Mater. Chem. A.</i> <b>2023</b> , 11, 9682-9690     |
| Mil53-HE                                           | Mil53-HE                                                           | 1.9 V @ 0.52 A cm <sup>-2</sup>                                                                | <i>Nano Energy.</i> <b>2025</b> , 134, 110529             |
| Etched-NiPB@MS                                     | Etched-NiPB@MS                                                     | 1.98 V @ 1 A cm <sup>-2</sup>                                                                  | <i>Nano Energy.</i> <b>2024</b> , 128, 109923             |
| FeCoNiCuMo/NM                                      | NiFe-LDH                                                           | 1.777 V @ 2 A cm <sup>-2</sup>                                                                 | <i>Nano Energy.</i> <b>2024</b> , 126, 109703             |
| Mn-NiFe@WO <sub>x</sub>                            | Mn-NiFe@WO <sub>x</sub>                                            | 1.91 V @ 2 A cm <sup>-2</sup>                                                                  | <i>Chem. Eng. J.</i> <b>2024</b> , 500, 157106            |
| 3D-O <sub>2</sub> -Cat                             | PCMO                                                               | 1.63 V @ 1 A cm <sup>-2</sup>                                                                  | <i>Adv. Funct. Mater.</i> <b>2025</b> ,                   |

|                                             |                                             |                                  |                                                                                                                                     |
|---------------------------------------------|---------------------------------------------|----------------------------------|-------------------------------------------------------------------------------------------------------------------------------------|
|                                             |                                             |                                  | 35, 2423537                                                                                                                         |
| NA-LT-CA                                    | NA-LT-CA                                    | 1.975 V @ 0.8 A cm <sup>-2</sup> | <i>Chem. Eng. J.</i> <b>2024</b> , 486, 150180                                                                                      |
| NiMo                                        | NiFeOOH                                     | 1.91 V @ 2 A cm <sup>-2</sup>    | <i>ACS Energy Lett.</i> <b>2023</b> , 8, 5018-5024                                                                                  |
| MoNi <sub>4</sub> /MoO <sub>2</sub>         | Ni <sub>2</sub> P@FePO <sub>x</sub> Hy      | 1.715 V @ 1 A cm <sup>-2</sup>   | <i>Appl. Catal. B: Environ.</i> <b>2022</b> , 306, 121127                                                                           |
| NiMoCo                                      | NiFeCr-LDH                                  | 2.11 V @ 1 A cm <sup>-2</sup>    | <i>Small.</i> <b>2022</b> , 18, 2200303                                                                                             |
| Ni-Mo                                       | Ni-Fe                                       | 2 V @ 0.68 A cm <sup>-2</sup>    | <i>Angew. Chem. Int. Ed.</i> <b>2025</b> , 64, e202514264                                                                           |
| P-Co/Co(OH) <sub>2</sub>                    | NiFe-LDH                                    | 2.03 V @ 0.2 A cm <sup>-2</sup>  | <i>Adv. Energy Mater.</i> <b>2025</b> , 15, e03695.                                                                                 |
| Mn <sub>0.15</sub> -CoP/CC                  | Mn <sub>0.15</sub> -CoP/CC                  | 1.45 V @ 0.14 A cm <sup>-2</sup> | <i>Adv. Funct. Mater.</i> <b>2025</b> , <a href="https://doi.org/10.1002/adfm.202514250">https://doi.org/10.1002/adfm.202514250</a> |
| NiMo/NiMoP-C                                | IrO <sub>2</sub>                            | 1.8 V @ 1 A cm <sup>-2</sup>     | <i>Energy Environ. Sci.</i> , <b>2025</b> , 18, 4811-4820                                                                           |
| Ce <sub>0.1</sub> -CoP/Ni <sub>3</sub> P@NF | Ce <sub>0.1</sub> -CoP/Ni <sub>3</sub> P@NF | 1.81 V @ 1 A cm <sup>-2</sup>    | <i>Adv. Funct. Mater.</i> <b>2025</b> , 35, 2500861                                                                                 |
| NMF                                         | S-NiFeZn LDH/NF                             | 1.96 V @ 1 A cm <sup>-2</sup>    | <i>Adv. Funct. Mater.</i> <b>2025</b> , 35, 2501070                                                                                 |
| R-NiFe LDH                                  | R-NiFe LDH                                  | 2.19 @ 1 A cm <sup>-2</sup>      | <i>Adv. Funct. Mater.</i> <b>2025</b> , 35, 2505763                                                                                 |
| NiCoPi-NiS/NF                               | FePi-NiS/NF                                 | 2.1 @ 1 A cm <sup>-2</sup>       | <i>Appl. Catal. B Environ.</i> <b>2024</b> , 340, 123252                                                                            |
| Cu <sub>2</sub> S@Ni                        | NiFeP@Ag                                    | 1.88 V @ 0.4 A cm <sup>-2</sup>  | <i>Adv. Mater.</i> <b>2023</b> , 36, 2306062                                                                                        |
| Ni/CeO <sub>x</sub>                         | Ni-Fe-Zn                                    | 1.981 V @ 2 A cm <sup>-2</sup>   | <i>Energy Environ. Sci.</i> <b>2025</b> , 18, 6248-6259                                                                             |
| Ni <sub>3</sub> N/Ni/Ti mesh                | NiFe <sub>2</sub> O <sub>4</sub>            | 1.88 V @ 0.5 A cm <sup>-2</sup>  | <i>Energy Environ. Sci.</i> <b>2022</b> , 15, 185-195                                                                               |
| NiMoN                                       | d-(Fe,Ni)OOH                                | 1.795 V @ 0.5 A cm <sup>-2</sup> | <i>Adv. Mater.</i> <b>2023</b> , 35, 2306097                                                                                        |
| NiMoCu                                      | NiFe LDH                                    | 1.56 V @ 0.2 A cm <sup>-2</sup>  | <i>Adv. Energy Mater.</i> <b>2025</b> , 15, 2501852                                                                                 |

|                                      |                                      |                                   |                                                                                                                                        |
|--------------------------------------|--------------------------------------|-----------------------------------|----------------------------------------------------------------------------------------------------------------------------------------|
| O-NiMoP/NF                           | O-NiMoP/NF                           | 1.85 V @ 0.05 A cm <sup>-2</sup>  | <i>Adv. Funct. Mater.</i> <b>2021</b> ,<br>31, 2104951                                                                                 |
| NiMoFe HI                            | NiMoFe HI                            | 1.68 V @ 0.1 A cm <sup>-2</sup>   | <i>ACS Catal.</i> <b>2024</b> , 14,<br>18003                                                                                           |
| NiMoN/Ni <sub>3</sub> S <sub>2</sub> | NiMoN/Ni <sub>3</sub> S <sub>2</sub> | 1.63 V @ 0.1 A cm <sup>-2</sup>   | <i>Adv. Funct. Mater.</i> <b>2025</b> ,<br>35, 2409924                                                                                 |
| Co(OH) <sub>2</sub> /NiMo<br>CA@CC   | Co(OH) <sub>2</sub> /NiMo<br>CA@CC   | 1.65 V @ 0.15 A cm <sup>-2</sup>  | <i>Adv. Funct. Mater.</i> <b>2021</b> ,<br>31, 2102117                                                                                 |
| NiMPL-PTL                            | NiMPL-PTL                            | 2.1 V @ 0.5 A cm <sup>-2</sup>    | <i>Joule</i> <b>2021</b> , 5, 1776-1799                                                                                                |
| NiCoO-NiCo/C                         | CuCoO/NF                             | 1.85 V @ 0.504 A cm <sup>-2</sup> | <i>Appl. Catal. B Environ.</i><br><b>2021</b> , 292, 120170                                                                            |
| catalyst slurry                      | NiFeOOH                              | 1.9 V @ 3.6 A cm <sup>-2</sup>    | <i>ACS Catal.</i> <b>2022</b> , 12, 135-<br>145                                                                                        |
| NiTe/Ni <sub>2</sub> FeP/NF          | NiTe/Ni <sub>2</sub> FeP/NF          | 2.49 V @ 1.5 A cm <sup>-2</sup>   | <i>Adv. Funct. Mater.</i> <b>2025</b> ,<br><a href="https://doi.org/10.1002/adfm.202528467">https://doi.org/10.1002/adfm.202528467</a> |
| Ni-Fe                                | Ni-Fe                                | 2 V @ 1.6 A cm <sup>-2</sup>      | <i>Energy Environ. Sci.</i><br><b>2021</b> , 14, 6338-6348                                                                             |
| Ni@NCW                               | NF                                   | 2.15 V @ 1.6 A cm <sup>-2</sup>   | <i>Adv. Mater.</i> <b>2024</b> , 36,<br>2304917                                                                                        |
| S-Co <sub>3</sub> O <sub>4</sub> /CC | S-Co <sub>3</sub> O <sub>4</sub> /CC | 1.9 V @ 1 A cm <sup>-2</sup>      | <i>Adv. Energy Mater.</i> <b>2024</b> ,<br>14, 2400052                                                                                 |
| LFA                                  | LFA                                  | 2 V @ 2.1 A cm <sup>-2</sup>      | <i>Adv. Mater.</i> <b>2024</b> , 36,<br>2307925                                                                                        |
| NiFeO <sub>x</sub>                   | HTS-Ru-NCs/TiN                       | 1.83 V @ 2 A cm <sup>-2</sup>     | <i>Adv. Mater.</i> <b>2024</b> , 36,<br>2403525                                                                                        |
| Co <sub>50</sub> Ni-C/NF             | RuO <sub>2</sub> /NF                 | 1.93 V @ 0.5 A cm <sup>-2</sup>   | <i>J. Colloid Interface Sci.</i><br><b>2026</b> , 707, 139746                                                                          |
| NiMo-H <sub>2</sub> @NF              | NiFe-LDH                             | 1.61 V @ 0.5 A cm <sup>-2</sup>   | <i>Nano Res.</i> <b>2024</b> , 17,<br>3769-3776                                                                                        |
| <b>Noble metal-based</b>             | /                                    | /                                 | /                                                                                                                                      |
| NA-Ru <sub>3</sub> Ni/C              | NA-Ru <sub>3</sub> Ni/C              | 2.05 V @ 1 A cm <sup>-2</sup>     | <i>Energy Environ. Sci.</i><br><b>2023</b> , 16, 285-294                                                                               |
| Pt black                             | IrO <sub>2</sub>                     | 1.75 V @ 0.5 A cm <sup>-2</sup>   | <i>Joule.</i> <b>2021</b> , 13, 51917-                                                                                                 |

|                                        |                                               |                                  |                                                                                                                                        |
|----------------------------------------|-----------------------------------------------|----------------------------------|----------------------------------------------------------------------------------------------------------------------------------------|
|                                        |                                               |                                  | 51924                                                                                                                                  |
| MOC-Ru                                 | RuO <sub>2</sub>                              | 1.97 V @ 0.25 A cm <sup>-2</sup> | <i>Adv. Mater.</i> <b>2023</b> , <i>35</i> , 2303331                                                                                   |
| Pt/C                                   | Co, Mo-NiFe LDH                               | 1.94 V @ 2 A cm <sup>-2</sup>    | <i>Adv. Energy Mater.</i> <b>2023</b> , <i>15</i> , 2203595                                                                            |
| IE 20 wt%                              | IE 20 wt%                                     | 1.75 V @ 1 A cm <sup>-2</sup>    | <i>Small</i> , <b>2022</b> , <i>18</i> , 2200380                                                                                       |
| Pt/C                                   | CCO*                                          | 1.9 V @ 1 A cm <sup>-2</sup>     | <i>ACS Sustainable Chem. Eng.</i> <b>2020</b> , <i>8</i> , 2344-2349                                                                   |
| HfOx-in-Ir SSC/CP                      | RuO <sub>2</sub> /CP                          | 1.98 V @ 1 A cm <sup>-2</sup>    | <i>Adv. Mater.</i> <b>2025</b> , <i>37</i> , 2507080                                                                                   |
| us-HEA/CFP                             | NiFeOx                                        | 1.94 V @ 1 A cm <sup>-2</sup>    | <i>Adv. Mater.</i> <b>2025</b> , <i>37</i> , e08975                                                                                    |
| Pt-HEA-cluster/CeO <sub>2</sub> /C     | NiFe/NF                                       | 1.95 V @ 2 A cm <sup>-2</sup>    | <i>Adv. Mater.</i> <b>2025</b> , <a href="https://doi.org/10.1002/adma.202514269">https://doi.org/10.1002/adma.202514269</a>           |
| RuVCoCuZnW                             | RuVCoCuZnW                                    | 1.66 V @ 0.5 A cm <sup>-2</sup>  | <i>Adv. Funct. Mater.</i> <b>2025</b> , <a href="https://doi.org/10.1002/adfm.202517292">https://doi.org/10.1002/adfm.202517292</a>    |
| PtRu/C                                 | LDH-Ti <sub>9 wt%</sub> /HCC                  | 2 V @ 8.5 A cm <sup>-2</sup>     | <i>Nat. Commun.</i> <b>2025</b> , <i>16</i> , 11090                                                                                    |
| PtRu/C                                 | FNC/HCC                                       | 2 V @ 10.29 A cm <sup>-2</sup>   | <i>Energy Environ. Sci.</i> <b>2023</b> , <i>16</i> , 5019-5028                                                                        |
| Pt/C                                   | CoFeP@NiFe LDH                                | 1.67 V @ 1 A cm <sup>-2</sup>    | <i>J. Colloid Interface Sci.</i> <b>2026</b> , <i>706</i> , 139632                                                                     |
| Pt/C                                   | Co <sub>2.8</sub> ,W <sub>3.8</sub> -NiFe LDH | 1.86 V @ 1 A cm <sup>-2</sup>    | <i>Adv. Energy Mater.</i> <b>2024</b> , <i>14</i> , 2402046                                                                            |
| Pt/C                                   | Ru-S-NiFe LDH                                 | 1.92 V @ 1 A cm <sup>-2</sup>    | <i>Adv. Energy Mater.</i> <b>2025</b> , <i>15</i> , 2500554                                                                            |
| Pt/C                                   | RT-NiFe-LDH                                   | 1.69 V @ 1 A cm <sup>-2</sup>    | <i>Nat. Commun.</i> <b>2025</b> , <i>16</i> , 6138                                                                                     |
| Ru-Fe <sub>7</sub> C <sub>3</sub> @CNF | NiFe LDH                                      | 1.67 V @ 0.5 A cm <sup>-2</sup>  | <i>Angew. Chem. Int. Ed.</i> <b>2025</b> , <a href="https://doi.org/10.1002/anie.202517861">https://doi.org/10.1002/anie.202517861</a> |

|                  |                                     |                                 |                                                                                                                              |
|------------------|-------------------------------------|---------------------------------|------------------------------------------------------------------------------------------------------------------------------|
| Pt@S-NiFe LDH    | S-NiFe LDH                          | 1.74 V @ 0.2 A cm <sup>-2</sup> | <i>Adv. Mater.</i> <b>2023</b> , <i>35</i> , 2208209                                                                         |
| Pt/C             | CF-FeSO                             | 1.61 V @ 0.1 A cm <sup>-2</sup> | <i>Nat Commun.</i> <b>2022</b> , <i>13</i> , 605                                                                             |
| PtNi-octa        | Pt black                            | 1.98 V @ 0.5 A cm <sup>-2</sup> | <i>Adv. Energy Mater.</i> <b>2024</b> , <i>14</i> , 2302971                                                                  |
| Pt/C             | 2D-FGT <sub>v</sub>                 | 2.51 V @ 1 A cm <sup>-2</sup>   | <i>Adv. Sci.</i> <b>2024</b> , <i>11</i> , 2310115                                                                           |
| Pt/C             | (NiCo) <sub>3</sub> Se <sub>4</sub> | 2 V @ 2 A cm <sup>-2</sup>      | <i>Adv. Mater.</i> <b>2021</b> , <i>33</i> , 2103812                                                                         |
| PtNi/LDH         | PtNi/LDH                            | 2.20 V @ 0.8 A cm <sup>-2</sup> | <i>Adv. Funct. Mater.</i> <b>2024</b> , <i>34</i> , 2308575                                                                  |
| Pt/C             | PiperION-A60-HCO <sub>3</sub>       | 1.92 V @ 1 A cm <sup>-2</sup>   | <i>Nat. Commun.</i> <b>2024</b> , <i>15</i> , 3416                                                                           |
| Pt/C             | AF2-HLF825X                         | 1.90 V @ 1 A cm <sup>-2</sup>   | <i>Nat. Catal.</i> , <b>2024</b> , <i>7</i> , 546                                                                            |
| Turing Pt        | Sustainion X37-50                   | 2.40 V @ 0.8 A cm <sup>-2</sup> | <i>J. Am. Chem. Soc.</i> <b>2024</b> , <i>146</i> , 5355                                                                     |
| Pt/C             | d-NiOOH/NDL                         | 1.79 V @ 1 A cm <sup>-2</sup>   | <i>Adv. Mater.</i> <b>2025</b> , <a href="https://doi.org/10.1002/adma.202512188">https://doi.org/10.1002/adma.202512188</a> |
| Pt/C             | NDCO                                | 1.8 V @ 1 A cm <sup>-2</sup>    | <i>J. Am. Chem. Soc.</i> <b>2024</b> , <i>146</i> , 20379-20390                                                              |
| Pt/C             | GCB-NiFe                            | 1.68 V @ 1 A cm <sup>-2</sup>   | <i>Adv. Mater.</i> <b>2025</b> , <a href="https://doi.org/10.1002/adma.202509805">https://doi.org/10.1002/adma.202509805</a> |
| Pt/C             | Bi/BiCeO <sub>1.8</sub>             | 1.79 V @ 1 A cm <sup>-2</sup>   | <i>Adv. Mater.</i> <b>2024</b> , <i>36</i> , 2314211                                                                         |
| Pt/C             | NiFeO                               | 1.71 V @ 1 A cm <sup>-2</sup>   | <i>Energy Environ. Sci.</i> <b>2024</b> , <i>17</i> , 3347-3357                                                              |
| IrO <sub>2</sub> | EE.300s                             | 2 V @ 0.1 A cm <sup>-2</sup>    | <i>Energy Environ. Sci.</i> <b>2024</b> , <i>17</i> , 5854-5865                                                              |
| UP-RuNiSAs/C     | NiFeO <sub>x</sub>                  | 1.95 V @ 1 A cm <sup>-2</sup>   | <i>Nat. Commun.</i> <b>2024</b> , <i>15</i> , 2218                                                                           |
| CoCrOx           | Pt/C                                | 2.1 V @ 1.5 A cm <sup>-2</sup>  | <i>Nat. Commun.</i> <b>2024</b> , <i>15</i> , 3416                                                                           |

|               |                          |                                  |                                                                    |
|---------------|--------------------------|----------------------------------|--------------------------------------------------------------------|
| Ru-NiCr LDH-r | NiFe LDH                 | 1.8 V @ 1.8 A cm <sup>-2</sup>   | <i>ACS Catal.</i> <b>2024</b> , <i>14</i> ,<br>3466-3474           |
| Pt/C          | Ti-NFO                   | 1.73 V @ 1 A cm <sup>-2</sup>    | <i>ACS Catal.</i> <b>2024</b> , <i>14</i> ,<br>4453-4462           |
| Pt/C          | FCO 1.5                  | 1.85 V @ 1.59 A cm <sup>-2</sup> | <i>Adv. Funct. Mater.</i> <b>2024</b> ,<br><i>34</i> , 2314573     |
| Pt/C          | NiFeCo-OOH               | 1.809 V @ 2 A cm <sup>-2</sup>   | <i>Adv. Sci.</i> <b>2024</b> , <i>11</i> ,<br>2401782              |
| Pt/C          | Co <sub>0.15</sub> -NiNH | 1.99 V @ 1 A cm <sup>-2</sup>    | <i>Energy Environ. Sci.</i><br><b>2024</b> , <i>17</i> , 1468-1481 |
| Pt/C          | NiCoFe-NDA               | 1.8 V @ 0.325 A cm <sup>-2</sup> | <i>Energy Environ. Sci.</i><br><b>2021</b> , <i>14</i> , 6546-6553 |
